# Supplementary material
Source: MDPI journal article supplement (https://www.mdpi.com/1424-8247/15/1/33)

## **SUPPLEMENTARY MATERIAL 2**

### ***In vitro* Antibacterial Susceptibility of Different Pathogens to Thirty Nano-Polyoxometalates**

**Ștefana Bâlici<sup>a</sup>, Dan Rusu<sup>b</sup>, Emőke Páll<sup>c</sup>, Miuța Filip<sup>d</sup>, Flore Chirilă<sup>e</sup>, Gheorghe Zsolt Nicula<sup>a</sup>, Mihaela Laura Vică<sup>a,\*</sup>, Rodica Ungur<sup>f</sup>, Horea-Vladi Matei<sup>a</sup>, Nicodim Iosif Fiț<sup>e</sup>**

<sup>a</sup> "Iuliu Hațieganu" University of Medicine and Pharmacy, Faculty of Medicine, Department of Cell and Molecular Biology, Cluj-Napoca, România

<sup>b</sup> "Iuliu Hațieganu" University of Medicine and Pharmacy, Faculty of Pharmacy, Department of Physical-Chemistry, Cluj-Napoca, România

<sup>c</sup> University of Agricultural Science and Veterinary Medicine, Faculty of Veterinary Medicine, Department of Reproduction, Obstetrics and Veterinary Gynecology, Cluj-Napoca, România

<sup>d</sup> "Babeș-Bolyai" University, "Raluca Ripan" Institute for Research in Chemistry, Analytical and Environmental Chemistry Laboratory, Cluj-Napoca, România

<sup>e</sup> University of Agricultural Science and Veterinary Medicine, Faculty of Veterinary Medicine, Department of Microbiology and Immunology, Cluj-Napoca, România

<sup>f</sup> "Iuliu Hațieganu" University of Medicine and Pharmacy, Faculty of Medicine, Department of Medical Rehabilitation, Cluj-Napoca, România

\* Correspondence: mvica@umfcluj.ro

#### **Supplemental Table of Contents**

|                                                                                                                    |           |
|--------------------------------------------------------------------------------------------------------------------|-----------|
| <b>FTIR vibrational spectra of 27 nanoPOMs (Figures S6 – S32)</b>                                                  | <b>3</b>  |
| <b>Figures S6 – S9. FTIR spectra of nanoPOMs with saturated Keggin structures</b>                                  | <b>3</b>  |
| <b>Figures S10 – S15. FTIR spectra of nanoPOMs with mono-lacunary Keggin structures</b>                            | <b>5</b>  |
| <b>Figures S16 – S18. FTIR spectra of nanoPOMs with tri-lacunary Keggin structures</b>                             | <b>8</b>  |
| <b>Figure S19. FTIR spectrum of nanoPOM with tri-lacunary <i>pseudo</i>-Keggin structures</b>                      | <b>9</b>  |
| <b>Figures S20 – S23. FTIR spectra of nanoPOMs with tri-lacunary Keggin/sandwich type structures</b>               | <b>10</b> |
| <b>Figures S24 – S26. FTIR spectra of nanoPOMs with tri-lacunary <i>pseudo</i>-Keggin/sandwich type structures</b> | <b>12</b> |
| <b>Figures S27 – S31. FTIR spectra of nanoPOMs with cluster structures</b>                                         | <b>13</b> |
| <b>Figure S32. FTIR spectrum of nanoPOM, mono-lacunary Wells-Dawson with mixed addenda atoms</b>                   | <b>16</b> |

|                                                                                                                                                                                                                          |    |
|--------------------------------------------------------------------------------------------------------------------------------------------------------------------------------------------------------------------------|----|
| UV electronic spectra of 27 nanoPOMs (Figures S33 – S59)                                                                                                                                                                 | 17 |
| Figure S33 – S36. UV electronic spectra of nanoPOMs with saturated Keggin structures                                                                                                                                     | 17 |
| Figure S37 – S42. UV electronic spectra of nanoPOMs with mono-lacunary Keggin structures                                                                                                                                 | 18 |
| Figure S43 – S45. UV electronic spectra of nanoPOMs with tri-lacunary Keggin structures                                                                                                                                  | 19 |
| Figure S46. UV electronic spectrum of nanoPOM with tri-lacunary <i>pseudo</i> -Keggin structures                                                                                                                         | 20 |
| Figure S47 – S50. UV electronic spectra of nanoPOMs with tri-lacunary Keggin/sandwich type structures                                                                                                                    | 20 |
| Figure S51 – S53. UV electronic spectra of nanoPOMs with tri-lacunary <i>pseudo</i> -Keggin/sandwich type structures                                                                                                     | 22 |
| Figure S54 – S58. UV electronic spectra of nanoPOMs with cluster structures                                                                                                                                              | 23 |
| Figure S59. UV electronic spectrum of nanoPOM, mono-lacunary Wells-Dawson with mixed addenda atoms                                                                                                                       | 24 |
| <br>Bacterial inoculi microplates prepared from various reference strains inhibited by the 21 analyzed nanoPOMs (Figures S60 – S64)                                                                                      | 25 |
| Figure S60. Inhibition aspects for the 21 nanoPOMs analyzed (in microplates of bacterial inoculum prepared from reference strain ATCC 6538P– <i>Staphylococcus aureus</i> ): A-C. Active nanoPOMs, D. Control samples.   | 25 |
| Figure S61. Inhibition aspects for the 21 nanoPOMs analyzed (in microplates of bacterial inoculum prepared from reference strain ATCC 14579 – <i>Bacillus cereus</i> ): A-C. Active nanoPOMs, D. Control samples.        | 25 |
| Figure S62. Inhibition aspects for the 21 nanoPOMs analyzed (in microplates of bacterial inoculum prepared from reference strain ATCC 13076 – <i>Salmonella enteritidis</i> ): A-C. Active nanoPOMs, D. Control samples. | 26 |
| Figure S63. Inhibition aspects for the 21 nanoPOMs analyzed (in microplates of bacterial inoculum prepared from reference strain ATCC 10536 – <i>Escherichia coli</i> ): A-C. Active nanoPOMs, D. Control samples.       | 26 |
| Figure S64. Inhibition aspects for the 21 nanoPOMs analyzed (in microplates of bacterial inoculum prepared from reference strain ATCC 27853 – <i>Pseudomonas aeruginosa</i> ): A-C. Active nanoPOMs, D. Control samples. | 27 |

## FTIR vibrational spectra of 27 nanoPOMs

### FTIR spectra of nanoPOMs with saturated Keggin structures

Figure S6. FTIR spectrum of POM 12,  $\text{H}_4[\text{SiW}_{12}\text{O}_{40}] \cdot 14\text{H}_2\text{O}$

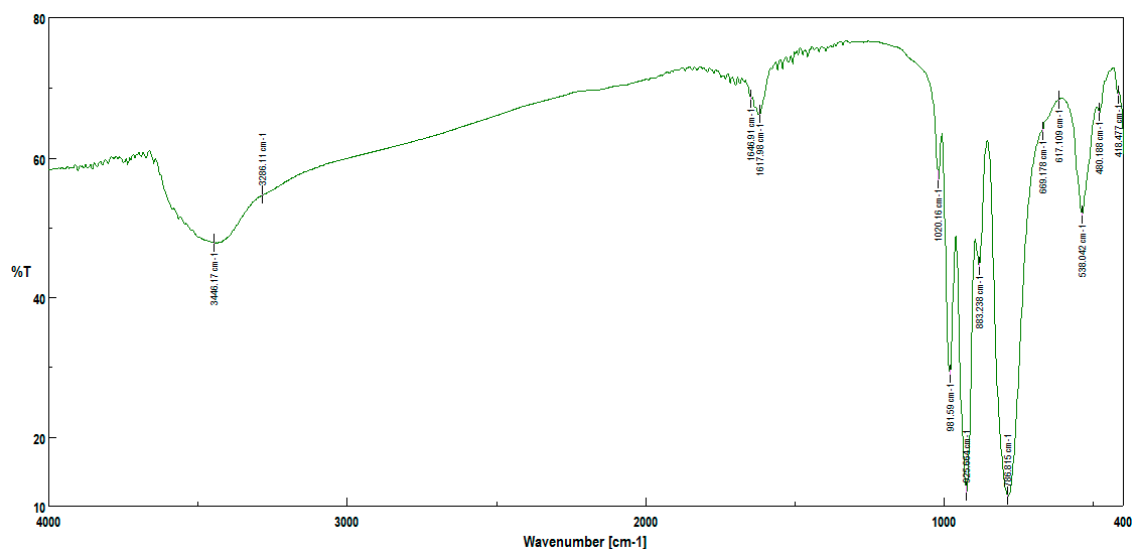

Figure S7. FTIR spectrum of POM 13,  $\text{H}_3[\text{PW}_{12}\text{O}_{40}] \cdot 12\text{H}_2\text{O}$

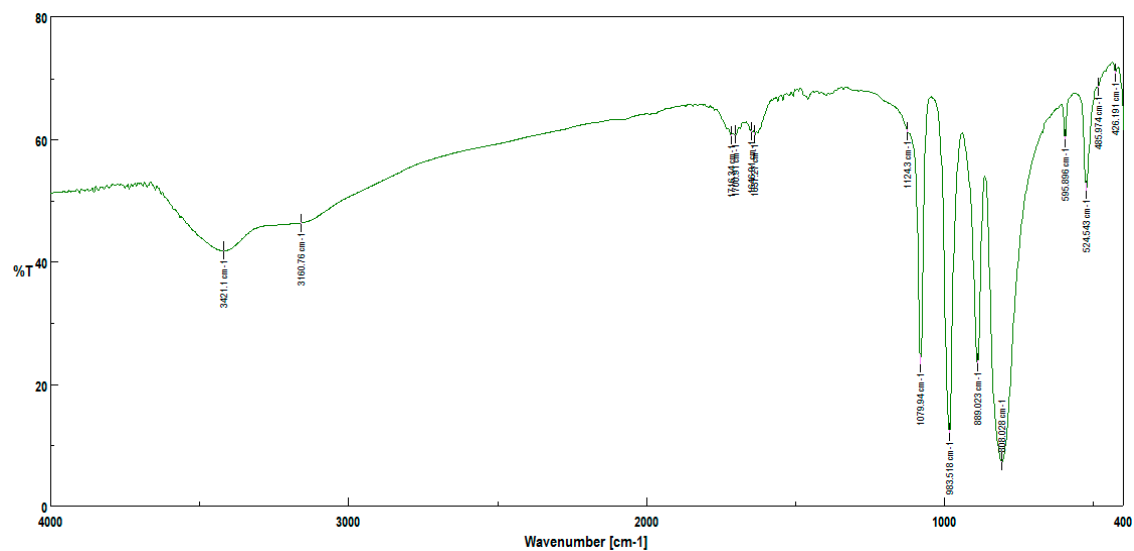

**Figure S8. FTIR spectrum of POM 14,  $\text{H}_3[\text{PMo}_{12}\text{O}_{40}] \cdot 13\text{H}_2\text{O}$**

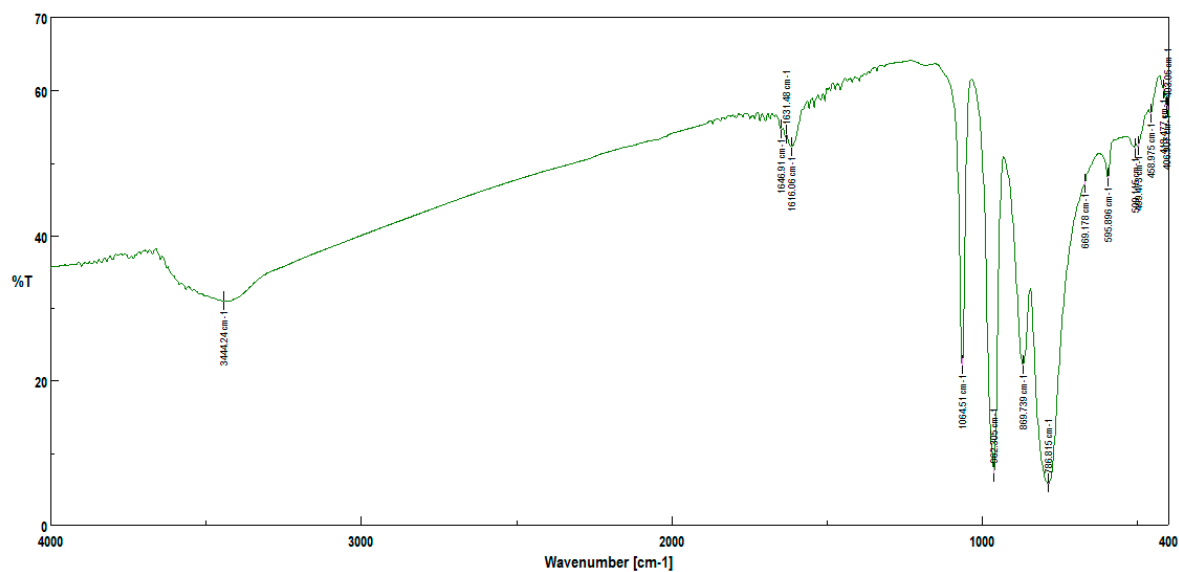

**Figure S9. FTIR spectrum of POM 6,  $\text{Na}_6[\text{PMo}_9^{\text{VI}}\text{V}_3^{\text{V}}\text{O}_{40}] \cdot 16\text{H}_2\text{O}$ , Keggin with mixed addenda atoms**

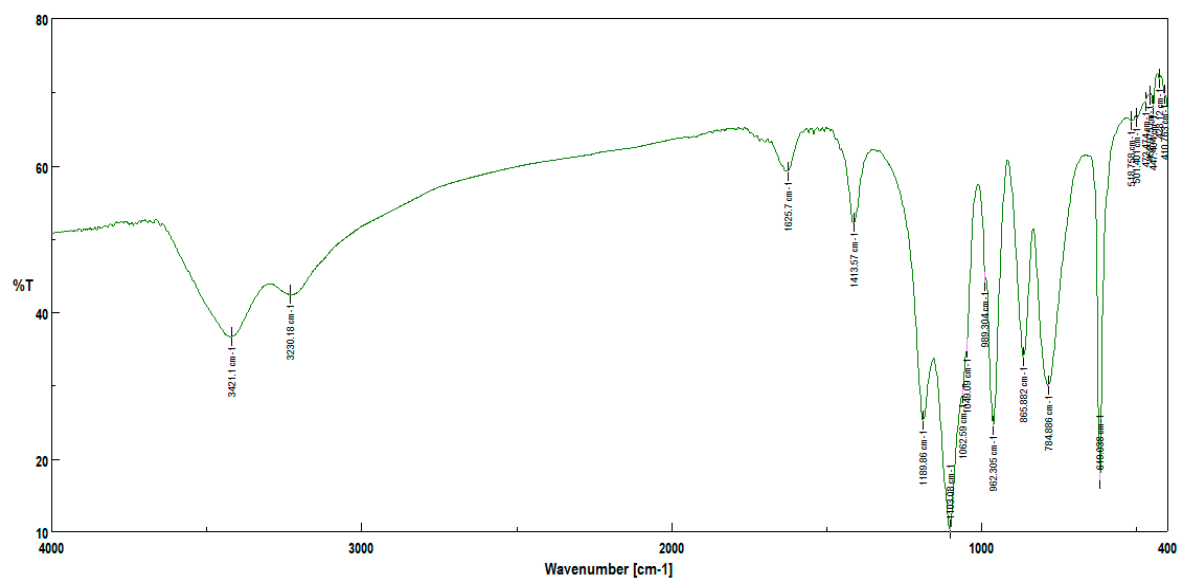

### FTIR spectra of nanoPOMs with mono-lacunary Keggin structures

Figure S10. FTIR spectrum of POM 1,  $\text{Na}_4[\text{Fe}^{\text{III}}(\text{H}_2\text{O})\text{PMo}_{11}\text{O}_{39}] \cdot 18\text{H}_2\text{O}$

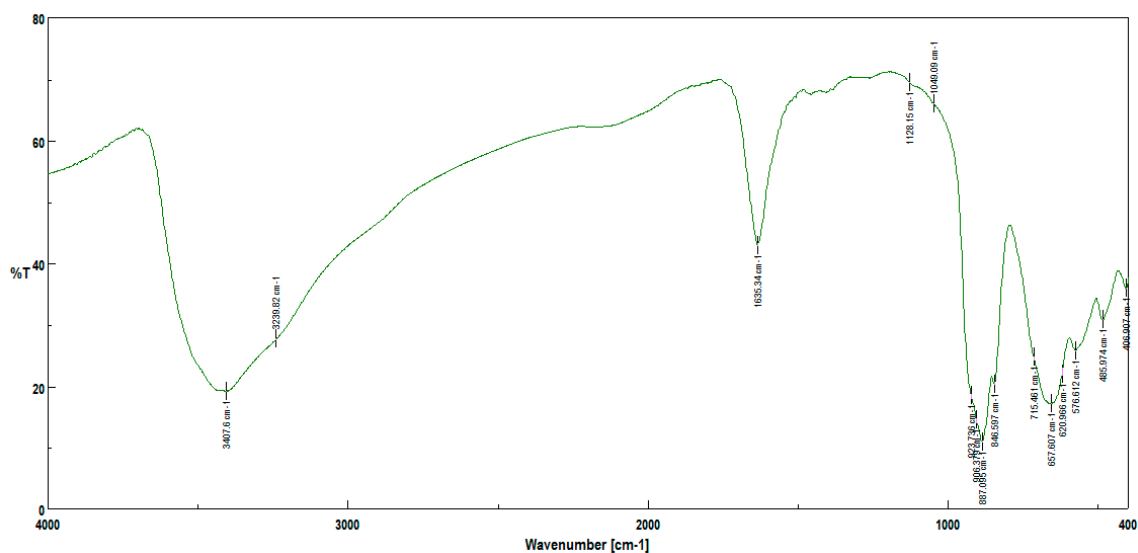

Figure S11. FTIR spectrum of POM 3,  $\text{Na}_8[\text{SiW}_{11}\text{O}_{39}] \cdot 12\text{H}_2\text{O}$

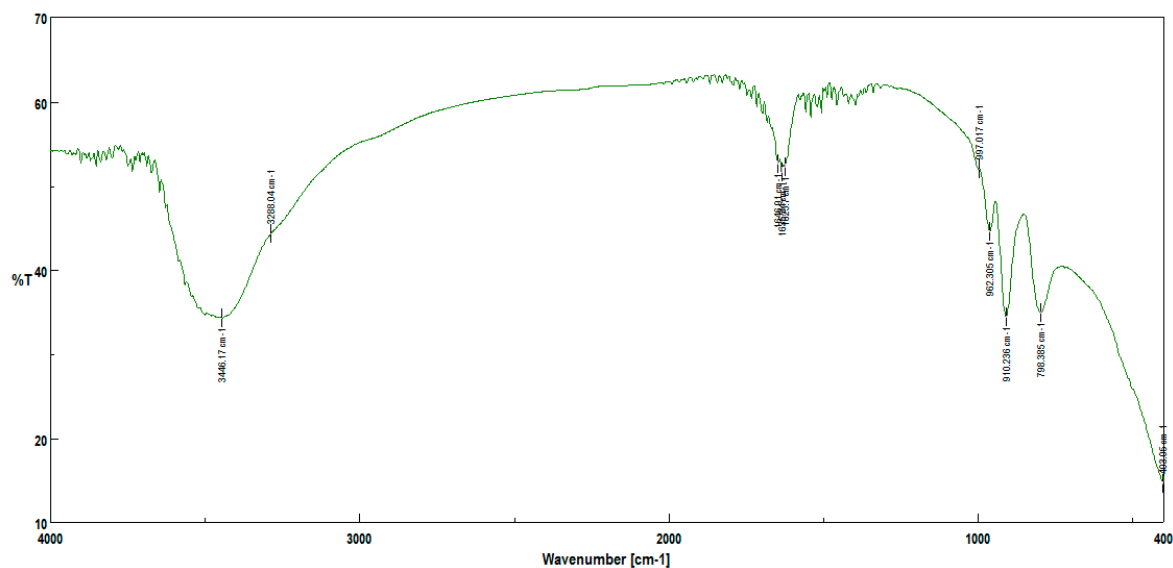

**Figure S12. FTIR spectrum of POM 23a,b,  $\text{Na}_5[\text{Fe}^{\text{III}}(\text{H}_2\text{O})\text{SiW}_{11}\text{O}_{39}] \cdot 24\text{H}_2\text{O}$**

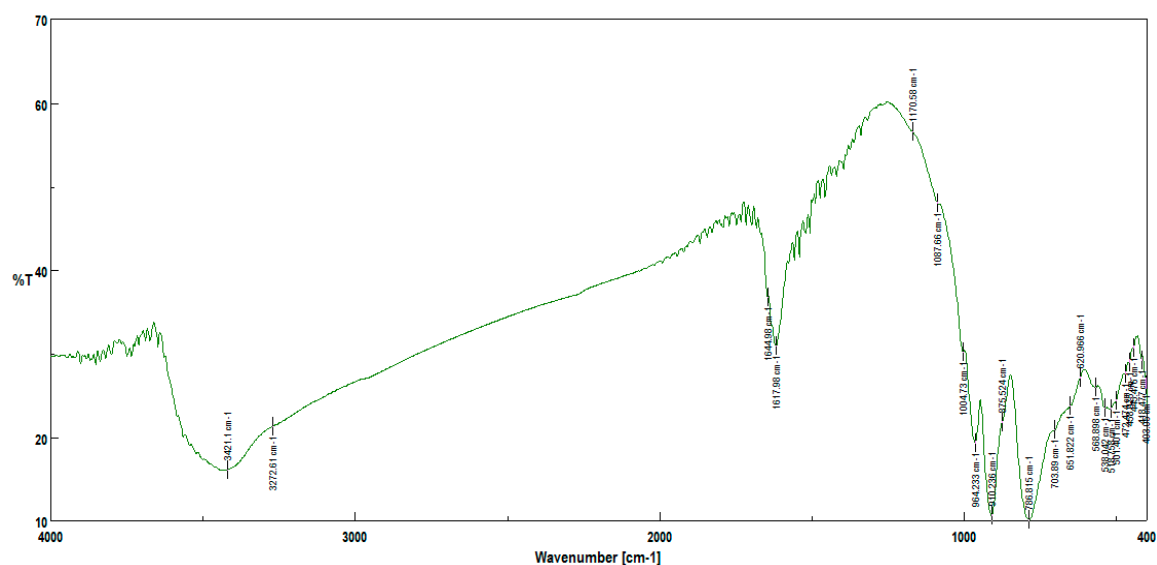

**Figure S13. FTIR spectrum of POM 24a,b,  $\text{Na}_5[\text{Fe}^{\text{III}}(\text{H}_2\text{O})\text{GeW}_{11}\text{O}_{39}] \cdot 26\text{H}_2\text{O}$**

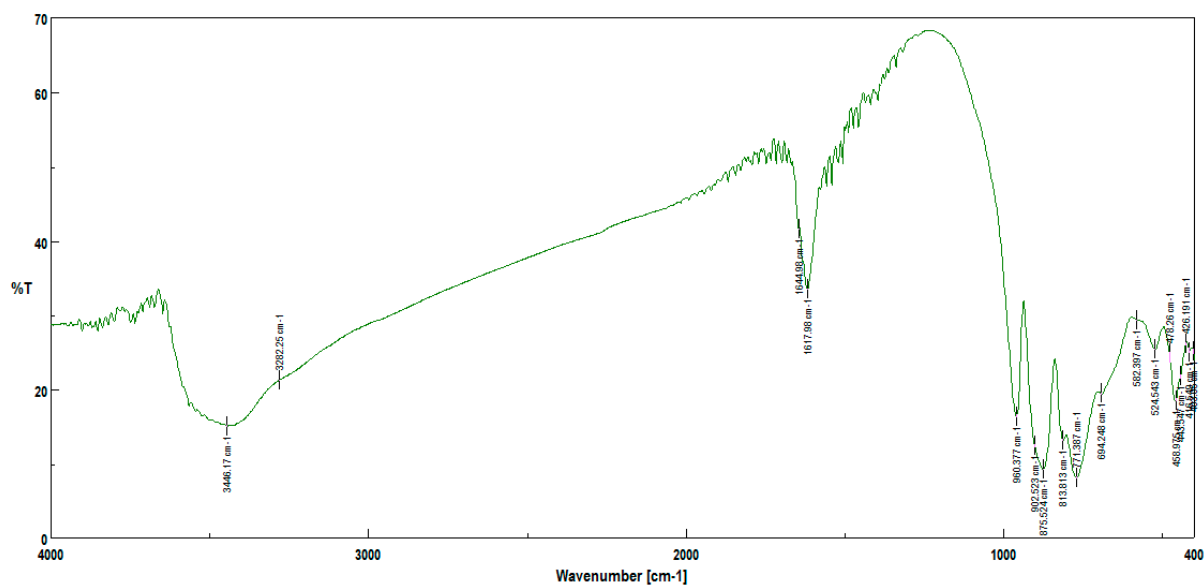

**Figure S14. FTIR spectrum of POM 30,  $K_6[Si^{IV}W_{11}O_{40}] \cdot 12H_2O$**

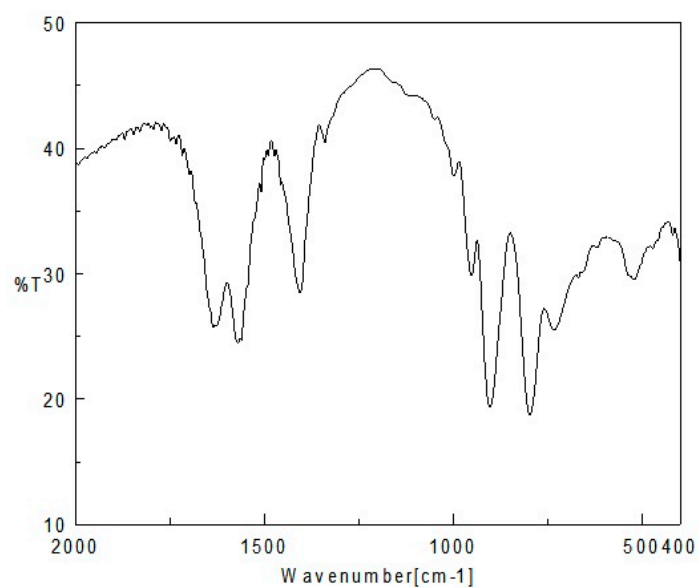

**Figure S15. FTIR spectrum of POM 21,  $K_6[Co(H_2O)SiMo_2W_9O_{39}] \cdot 14H_2O$ , mono-lacunary Keggin with mixed addenda atoms**

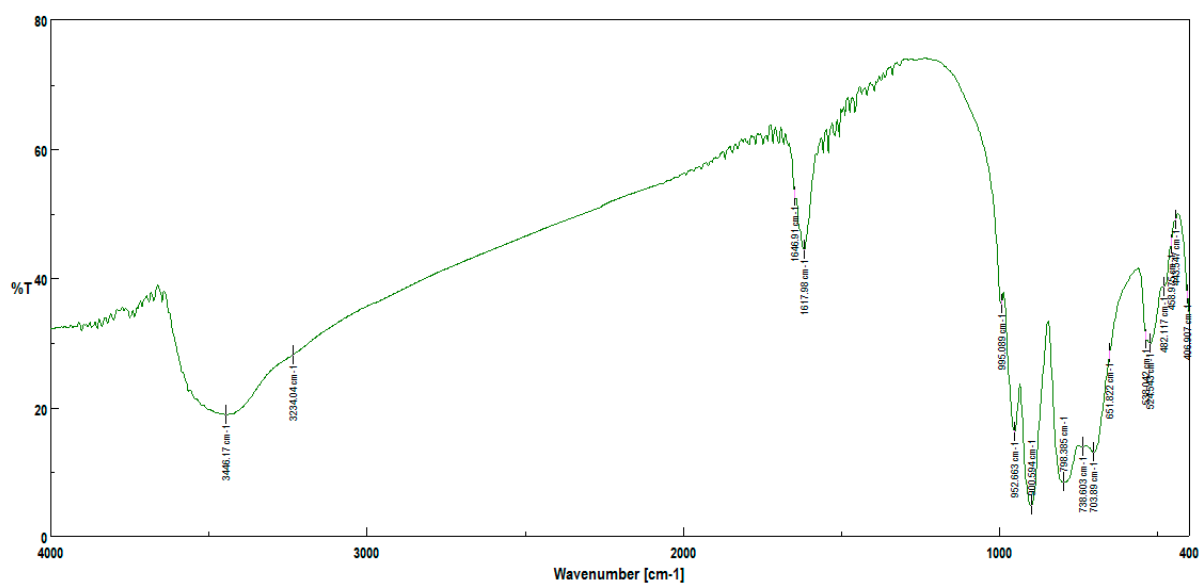

### FTIR spectra of nanoPOMs with tri-lacunary Keggin structures

Figure S16. FTIR spectrum of POM 5,  $K_3[(VO)_3PMo_9O_{34}] \cdot 14H_2O$

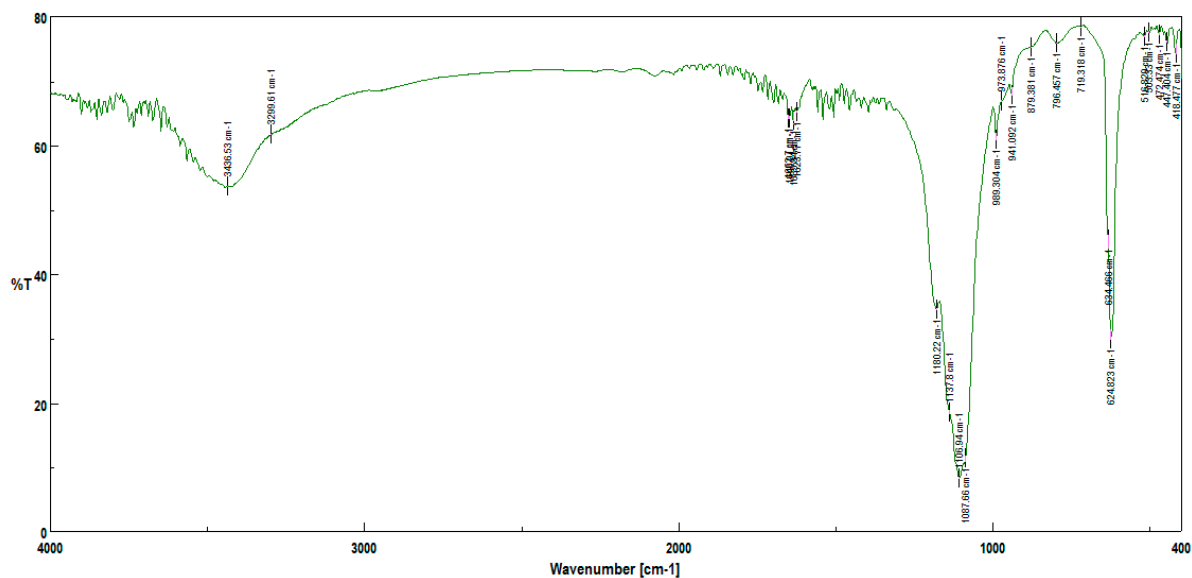

Figure S17. FTIR spectrum of POM 16a,b,  $Na_{10}[SiW_9O_{34}] \cdot 24H_2O$

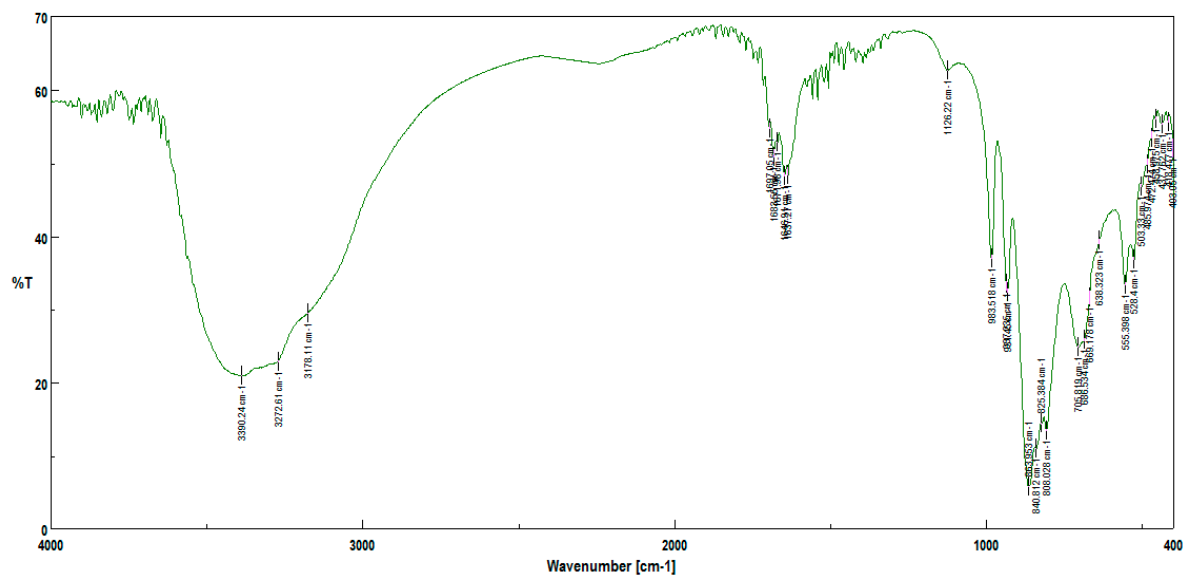



Figure S18. FTIR spectrum of POM 18,  $\text{Na}_8\text{H}[\text{PW}_9\text{O}_{34}] \cdot 20\text{H}_2\text{O}$

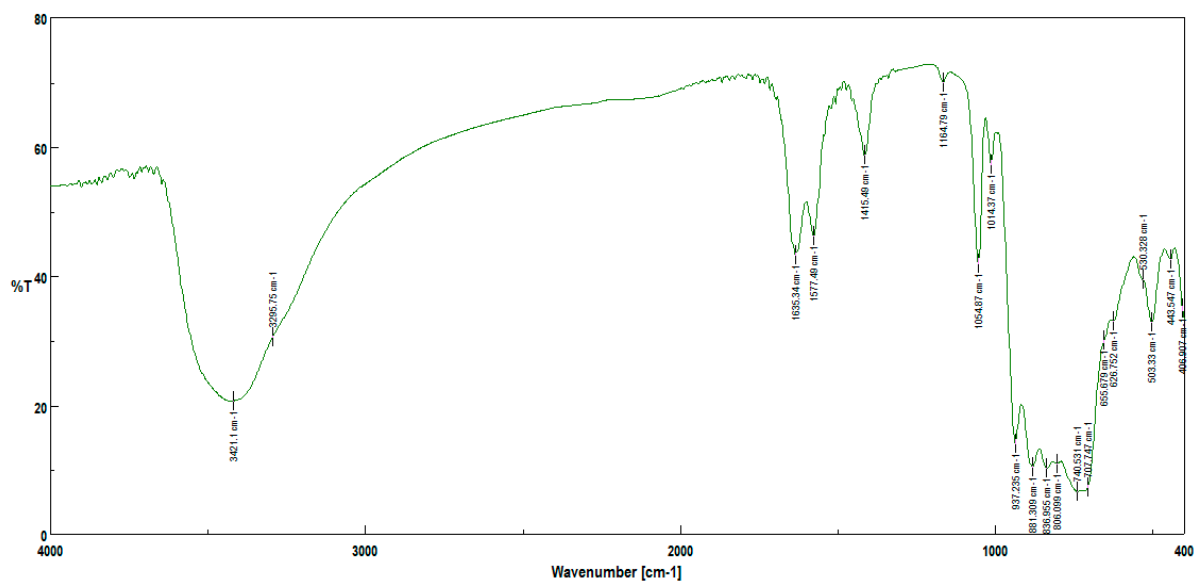

**FTIR spectrum of nanoPOM with tri-lacunary *pseudo*-Keggin structures**

Figure S19. FTIR spectrum of POM 15,  $\text{Na}_9[\text{SbW}_9\text{O}_{33}] \cdot 19.5\text{H}_2\text{O}$

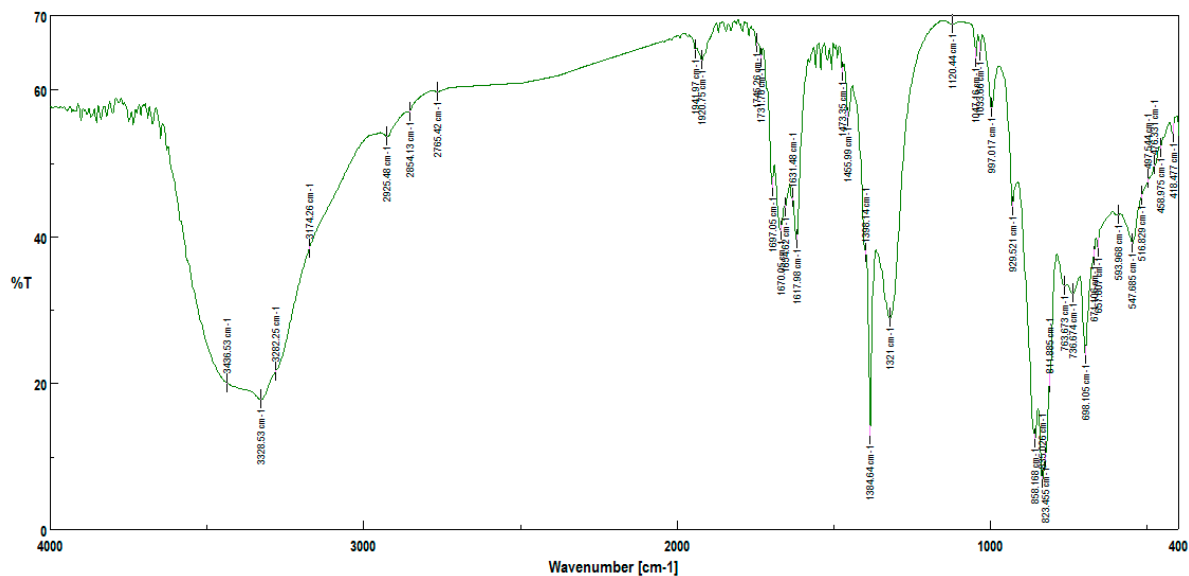

## FTIR spectra of nanoPOMs with tri-lacunary Keggin/sandwich type structures

Figure S20. FTIR spectrum of POM 2,  $\text{Na}_9[\text{Fe}_3(\text{H}_2\text{O})_3(\text{PMo}_9\text{O}_{34})_2]$

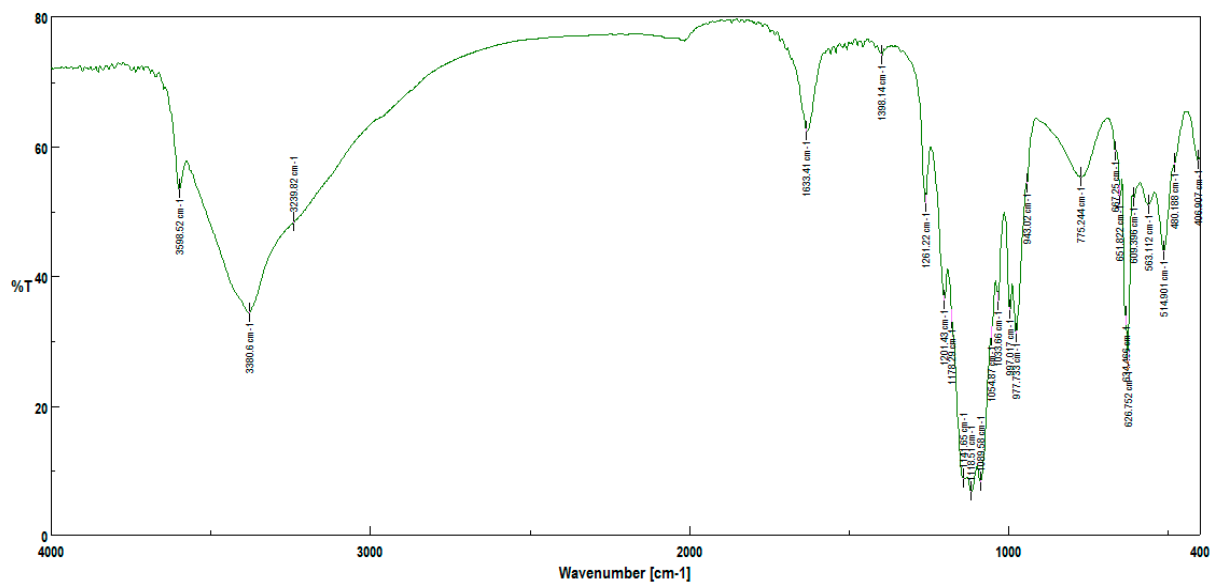

Figure S21. FTIR spectrum of POM 4,  $\text{Na}_{11}[\text{Fe}_3(\text{H}_2\text{O})_3(\text{SiW}_9\text{O}_{34})_2] \cdot 25\text{H}_2\text{O}$

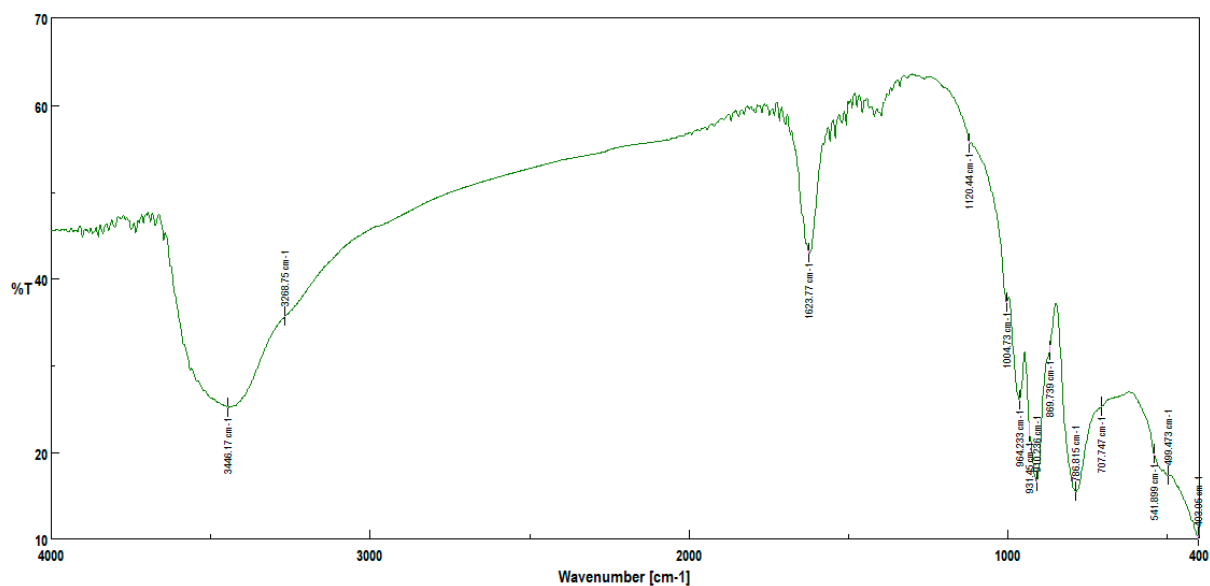

**Figure S22. FTIR spectrum of POM 8,  $K_{10}[(VO)_4(PW_9O_{34})_2] \cdot 26H_2O$**

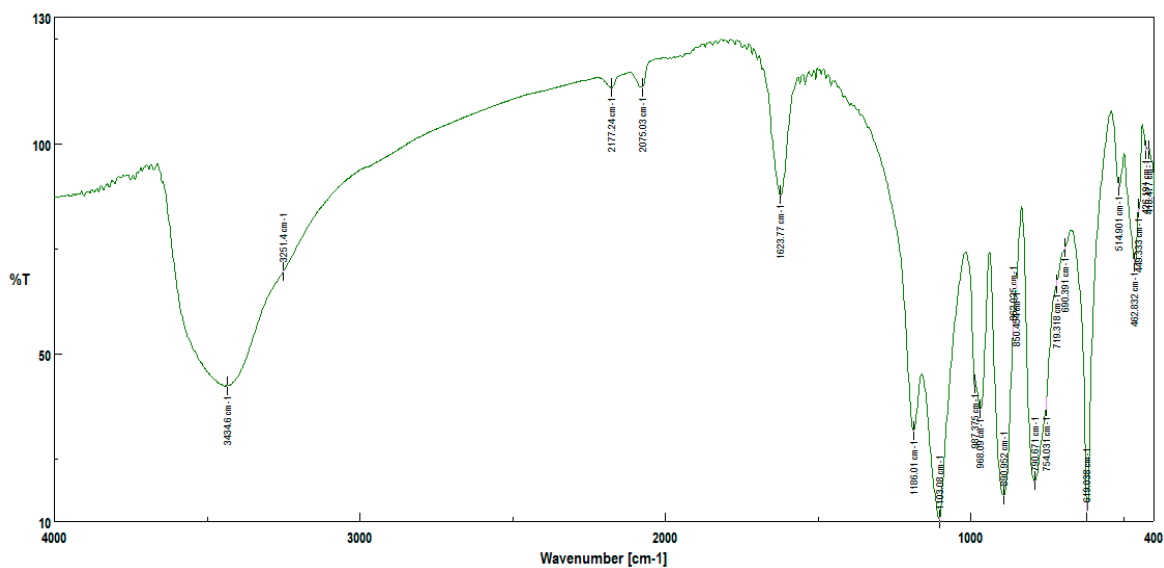

**Figure S23. FTIR spectrum of POM 27,  $Na_{14}[Mn_3(H_2O)_3(SiW_9O_{34})_2] \cdot 28H_2O$**

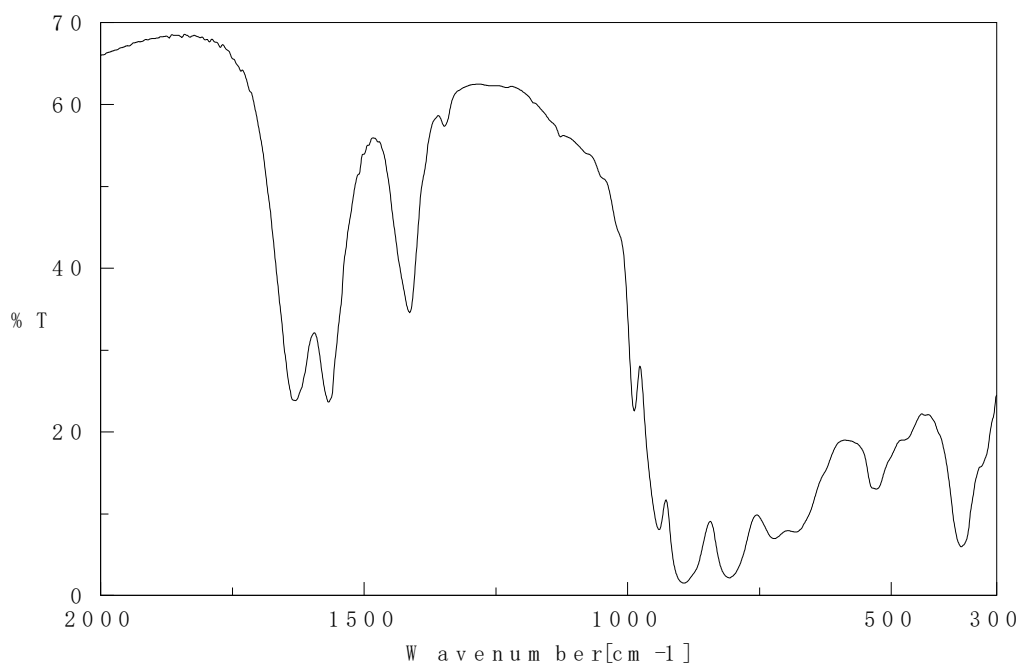

### FTIR spectra of nanoPOMs with tri-lacunary *pseudo*-Keggin/sandwich type structures

#### FTIR spectrum of POM 10, $\text{K}_{11}\text{H}[(\text{VO})_3(\text{Sb}^{\text{III}}\text{W}_9\text{O}_{33})_2] \cdot 27\text{H}_2\text{O}$

Published in our previous paper, cited in this paper as reference 22

#### Figure S24. FTIR spectrum of POM 25, $\text{Na}_{10}[\text{Mn}_4(\text{H}_2\text{O})_2(\text{AsW}_9\text{O}_{34})_2] \cdot 27\text{H}_2\text{O}$

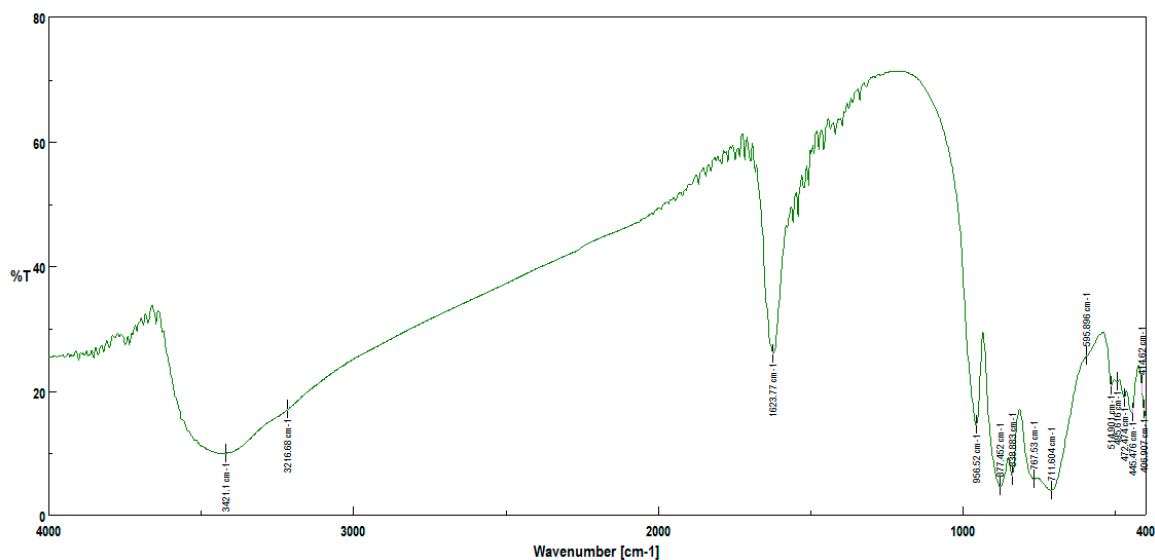

#### Figure S25. FTIR spectrum of POM 26, $\text{Na}_{12}[\text{Co}_3(\text{H}_2\text{O})_3(\text{BiW}_9\text{O}_{33})_2] \cdot 37\text{H}_2\text{O}$

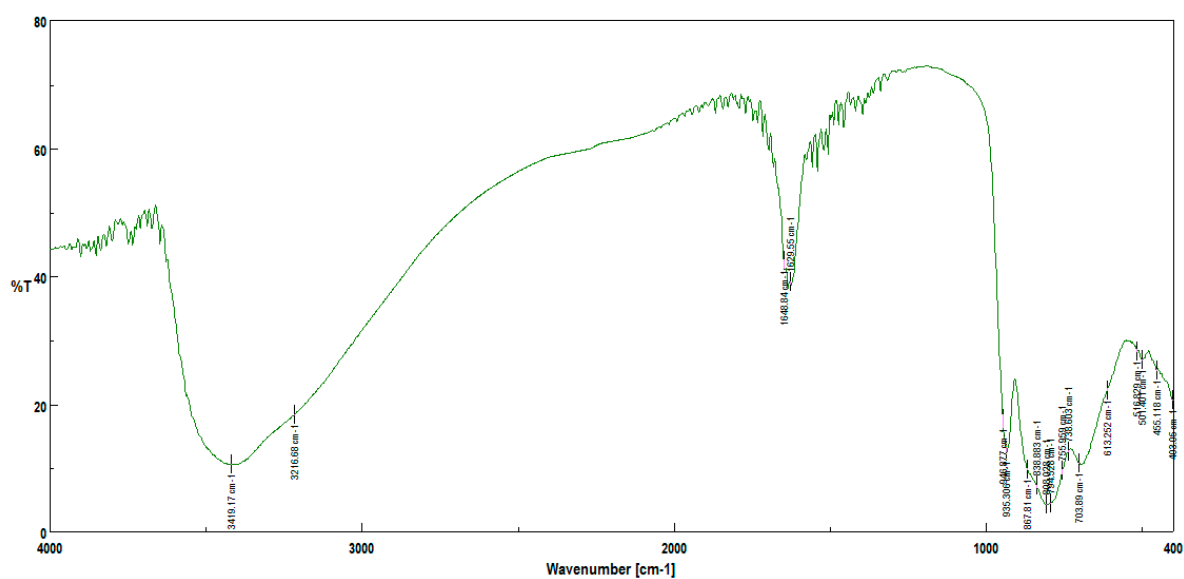

**Figure S26. FTIR spectrum of POM 9,  $K_{10}[(VO)_4(AsW_9O_{34})_2] \cdot 21H_2O$**

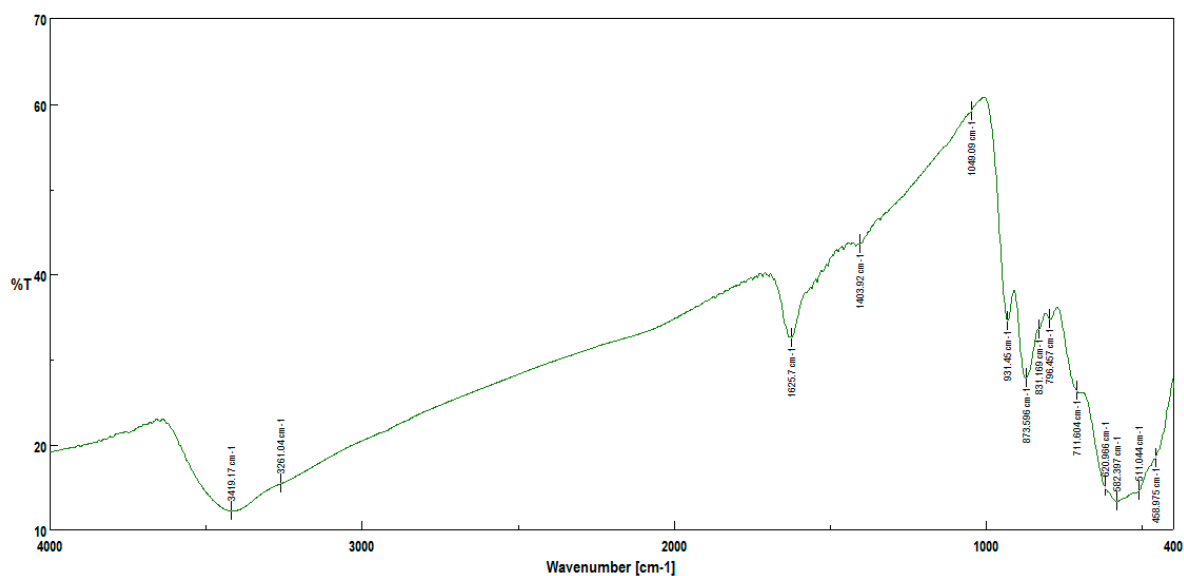

### FTIR spectra of nanoPOMs with cluster structures

**Figure S27. FTIR spectrum of POM 11,  $Na_{12}[Sb_2W_{22}O_{74}(OH)_2] \cdot 38H_2O$**

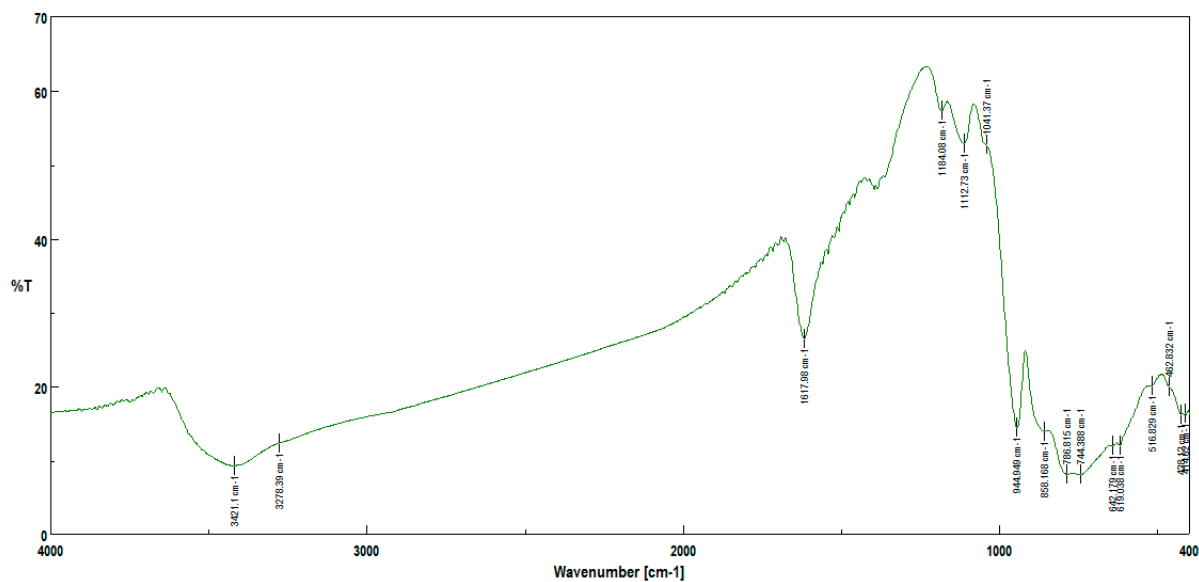

**Figure S28. FTIR spectrum of POM 17,  $\text{Na}_{27}[\text{NaAs}_4\text{W}_{40}\text{O}_{140}] \cdot 42\text{H}_2\text{O}$**

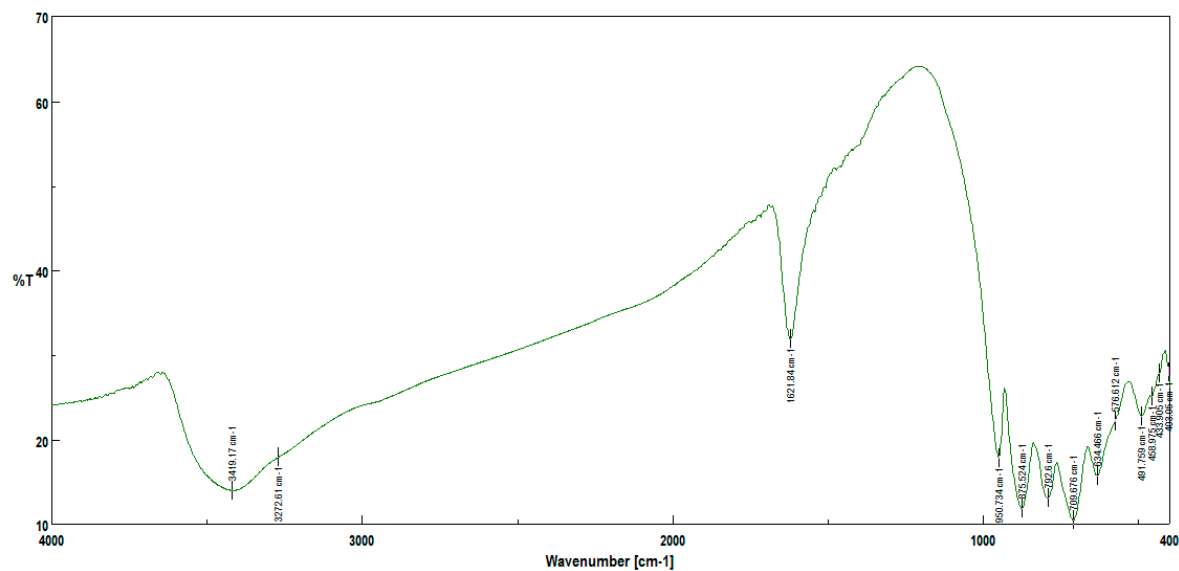

**Figure S29. FTIR spectrum of POM 19,  $(\text{NBu}_4)_{27}[\text{NaAs}_4\text{Mo}_{40}\text{O}_{140}] \cdot 12\text{H}_2\text{O}$**

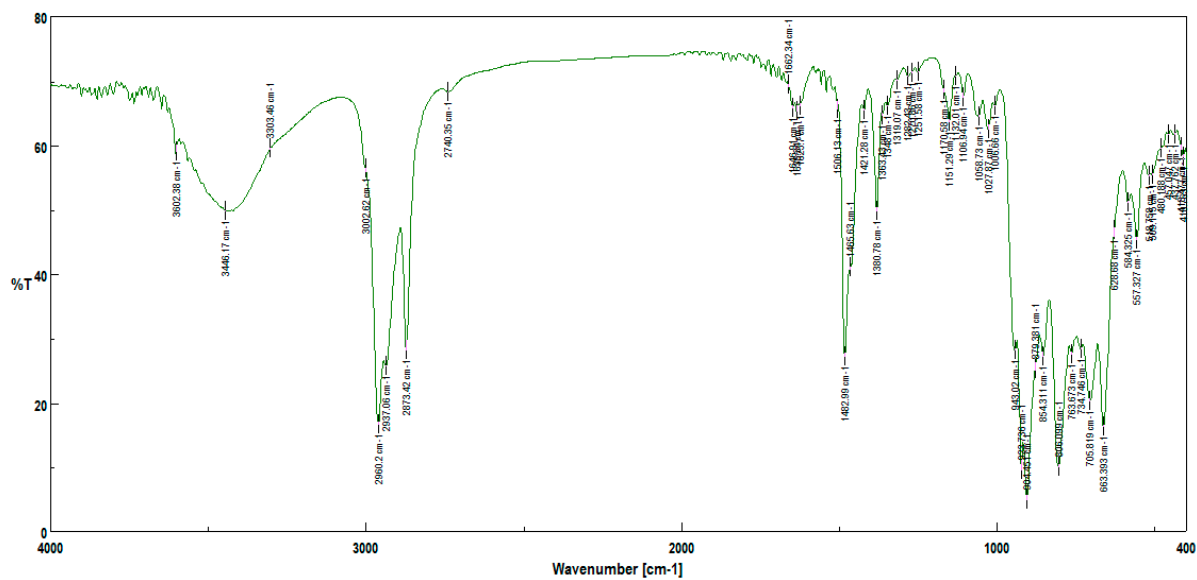

**Figure S30. FTIR spectrum of POM 20,  $(\text{Bu}_3\text{Sn})_{18}[\text{NaSb}_9\text{W}_{21}\text{O}_{86}]$**

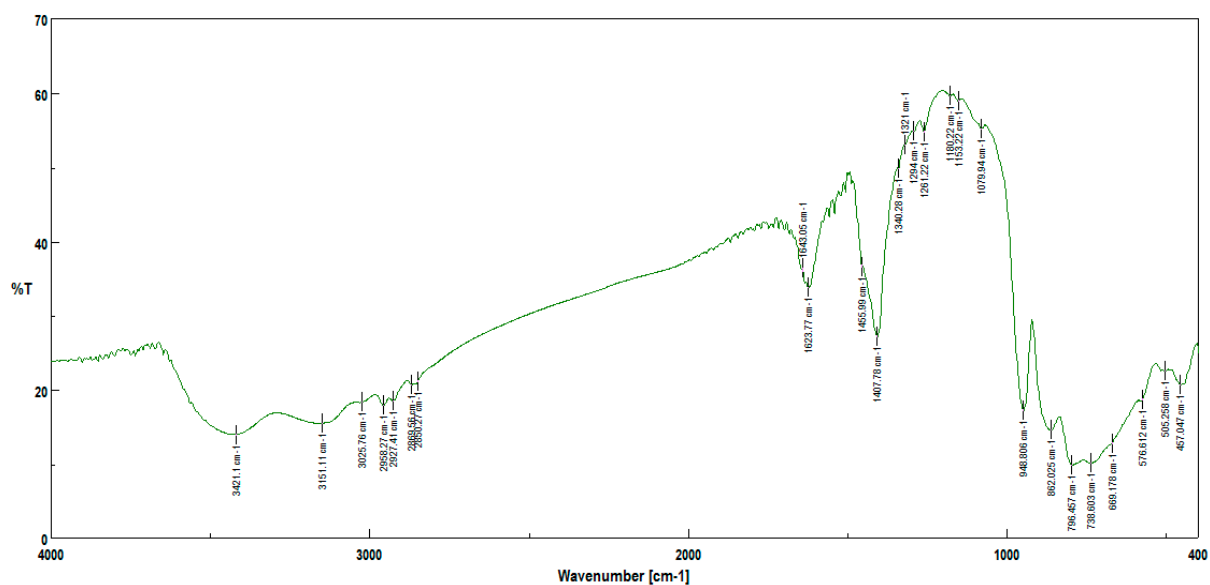

**FTIR spectrum of POM 28,  $(\text{NH}_4)_4(\text{NBu}_4)_5[\text{Na}(\text{BuSn})_3\text{Sb}_9\text{W}_{21}\text{O}_{86}] \cdot 17\text{H}_2\text{O}$**

Published in our previous paper, cited in this paper as reference 22

**Figure S31. FTIR spectrum of POM 29,  $\text{K}_{27}[\text{NaAs}_4\text{W}_{40}\text{O}_{140}] \cdot 52\text{H}_2\text{O}$**

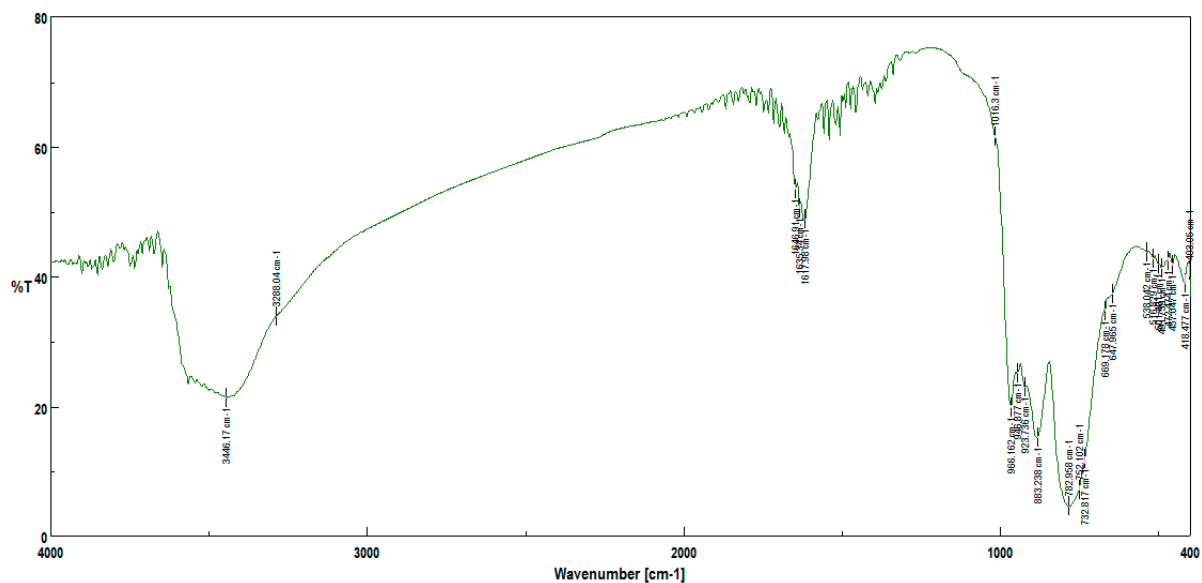

**FTIR spectrum of nanoPOM, mono-lacunary Wells-Dawson with mixed addenda atoms**

**Figure S32. FTIR spectrum of POM 22,  $K_{10}[Co(H_2O)Si_2MoW_{16}O_{61}] \cdot 18H_2O$**

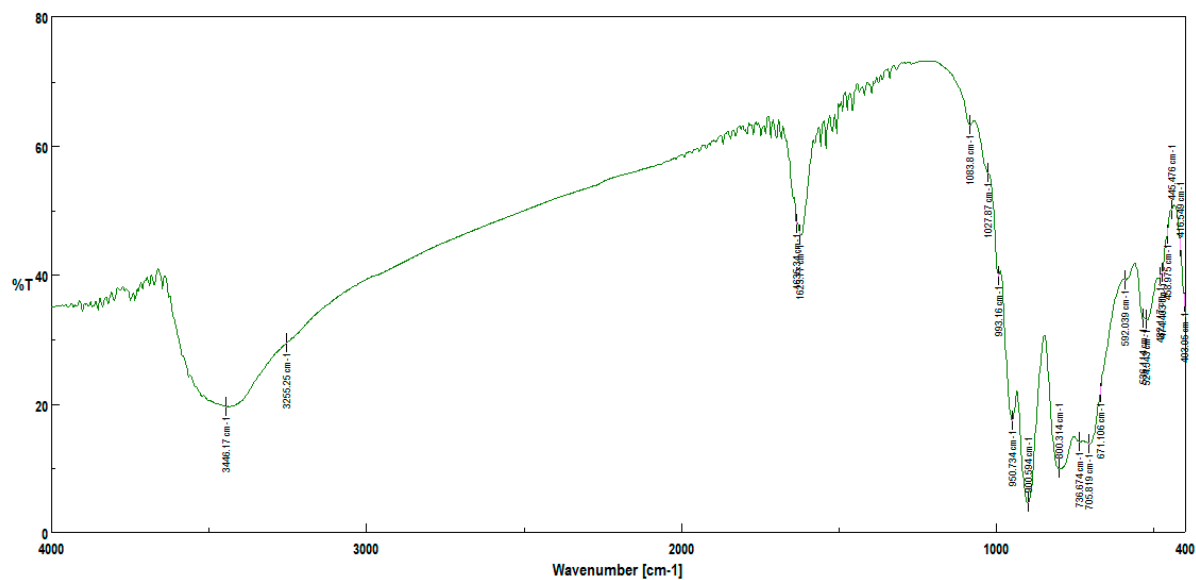



## UV electronic spectra of 27 nanoPOMs

### UV electronic spectra of nanoPOMs with saturated Keggin structures

**Figure S33. UV electronic spectrum of POM 12,  $\text{H}_4[\text{SiW}_{12}\text{O}_{40}] \cdot 14\text{H}_2\text{O}$**

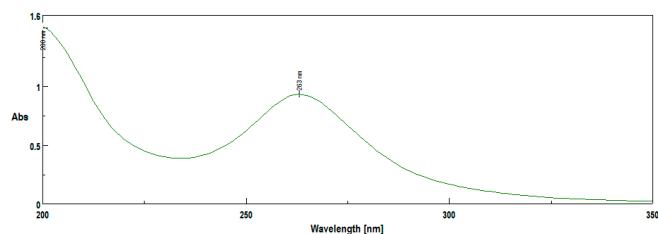

**Figure S34. UV electronic spectrum of POM 13,  $\text{H}_3[\text{PW}_{12}\text{O}_{40}] \cdot 12\text{H}_2\text{O}$**

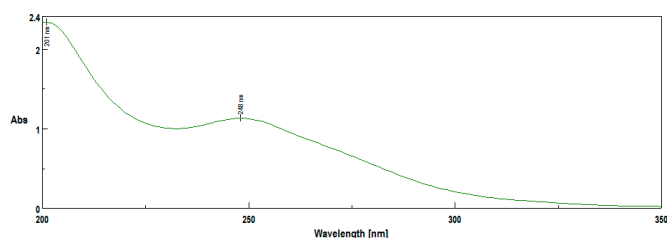

**Figure S35. UV electronic spectrum of POM 14,  $\text{H}_3[\text{PMo}_{12}\text{O}_{40}] \cdot 13\text{H}_2\text{O}$**

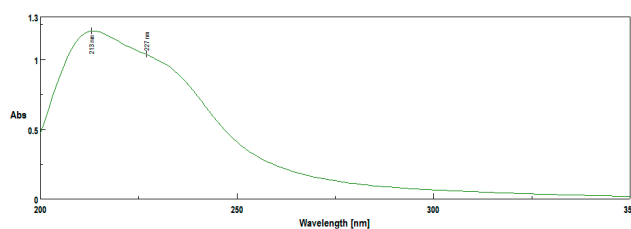

**Figure S36. UV electronic spectrum of POM 6,  $\text{Na}_6[\text{PMo}_9\text{V}^{\text{VI}}\text{V}_3^{\text{VO}}\text{O}_{40}] \cdot 16\text{H}_2\text{O}$ , Keggin with mixed addenda atoms**

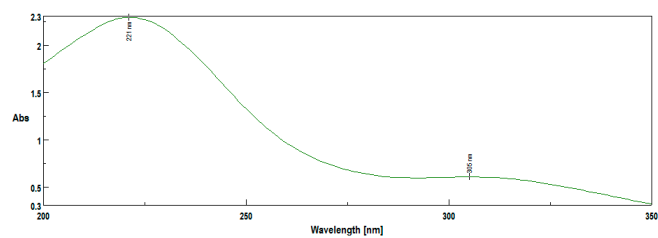

### UV electronic spectra of nanoPOMs with mono-lacunary Keggin structures

**Figure S37. UV electronic spectrum of POM 1,  $\text{Na}_4[\text{Fe}^{\text{III}}(\text{H}_2\text{O})\text{PMo}_{11}\text{O}_{39}] \cdot 18\text{H}_2\text{O}$**

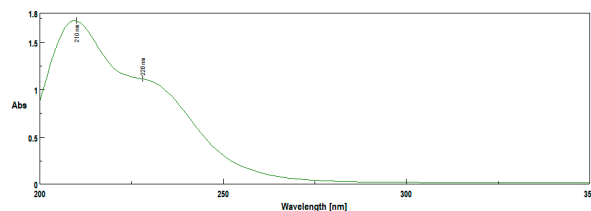

**Figure S38. UV electronic spectrum of POM 3,  $\text{Na}_8[\text{SiW}_{11}\text{O}_{39}] \cdot 12\text{H}_2\text{O}$**

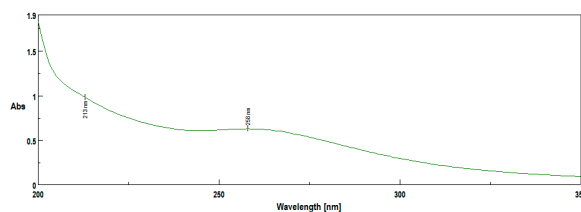

**Figure S39. UV electronic spectrum of POM 23a,b,  $\text{Na}_5[\text{Fe}^{\text{III}}(\text{H}_2\text{O})\text{SiW}_{11}\text{O}_{39}] \cdot 24\text{H}_2\text{O}$**

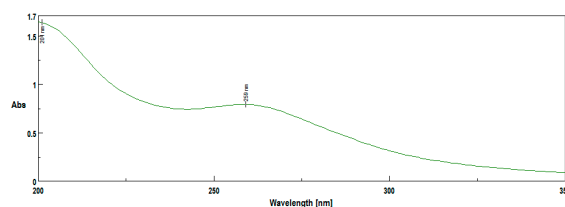

**Figure S40. UV electronic spectrum of POM 24a,b,  $\text{Na}_5[\text{Fe}^{\text{III}}(\text{H}_2\text{O})\text{GeW}_{11}\text{O}_{39}] \cdot 26\text{H}_2\text{O}$**

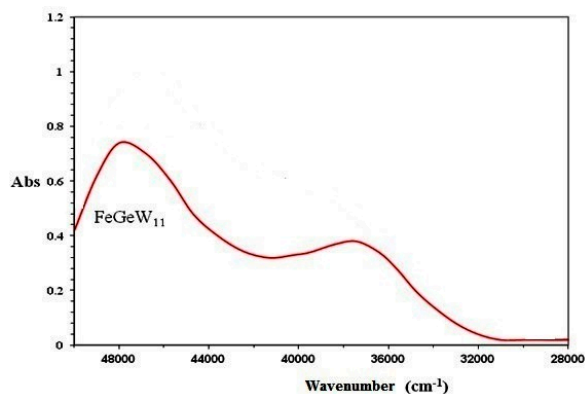

**Figure S41. UV electronic spectrum of POM 30,  $K_6[SiV^{IV}W_{11}O_{40}] \cdot 12H_2O$**

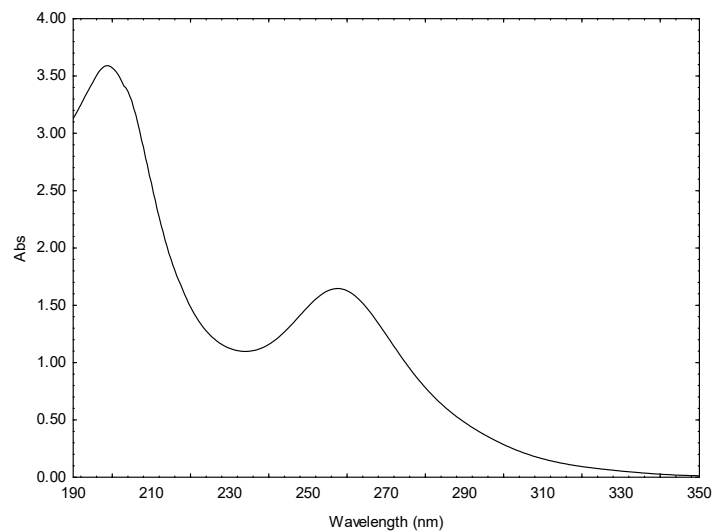

**Figure S42. UV electronic spectrum of POM 21,  $K_6[Co(H_2O)SiMo_2W_9O_{39}] \cdot 14H_2O$ , mono-lacunary Keggin with mixed addenda atoms**

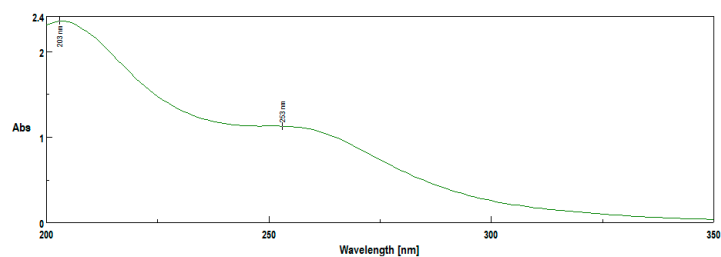

**UV electronic spectra of nanoPOMs with tri-lacunary Keggin structures**

**Figure S43. UV electronic spectrum of POM 5,  $K_3[(VO)_3PMo_9O_{34}] \cdot 14H_2O$**

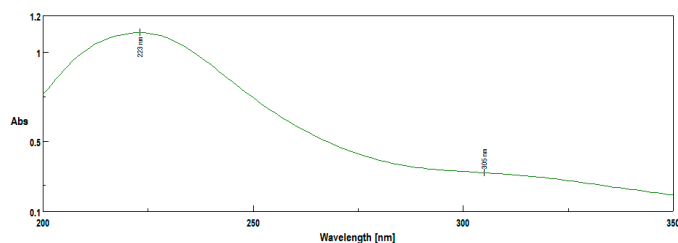

**Figure S44. UV electronic spectrum of POM 16a,b,  $\text{Na}_{10}[\text{SiW}_9\text{O}_{34}] \cdot 24\text{H}_2\text{O}$**

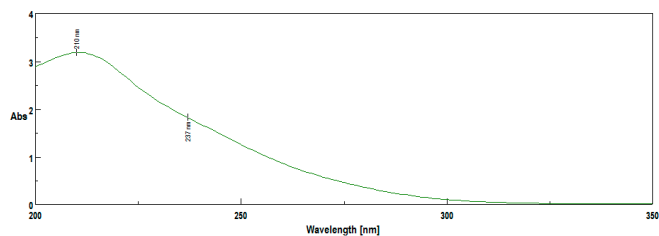

**Figure S45. UV electronic spectrum of POM 18,  $\text{Na}_8\text{H}[\text{PW}_9\text{O}_{34}] \cdot 20\text{H}_2\text{O}$**

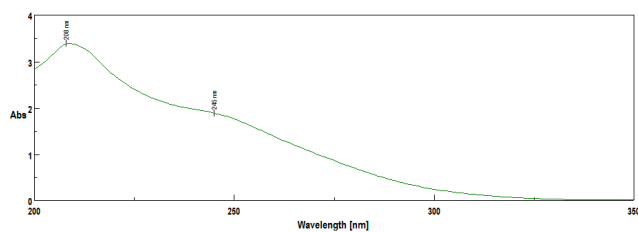

**UV electronic spectrum of nanoPOM with tri-lacunary *pseudo*-Keggin structures**

**Figure S46. UV electronic spectrum of POM 15,  $\text{Na}_9[\text{SbW}_9\text{O}_{33}] \cdot 19,5\text{H}_2\text{O}$**

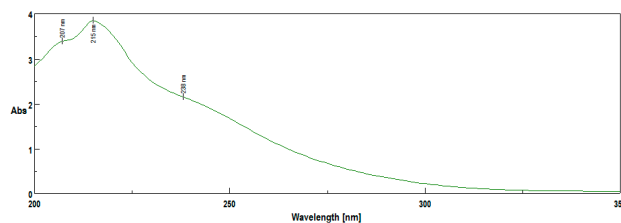

**UV electronic spectra of nanoPOMs with tri-lacunary Keggin/sandwich type structures**

**Figure S47. UV electronic spectrum of POM 2,  $\text{Na}_9[\text{Fe}_3(\text{H}_2\text{O})_3(\text{PMo}_9\text{O}_{34})_2]$**

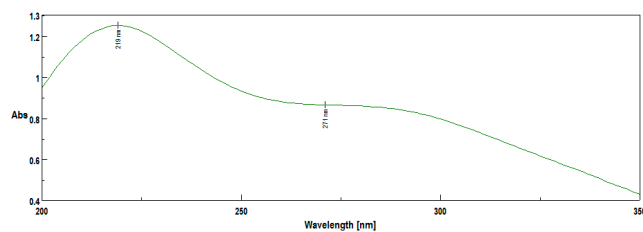

**Figure S48. UV electronic spectrum of POM 4,  $\text{Na}_{11}[\text{Fe}_3(\text{H}_2\text{O})_3(\text{SiW}_9\text{O}_{34})_2] \cdot 25\text{H}_2\text{O}$**

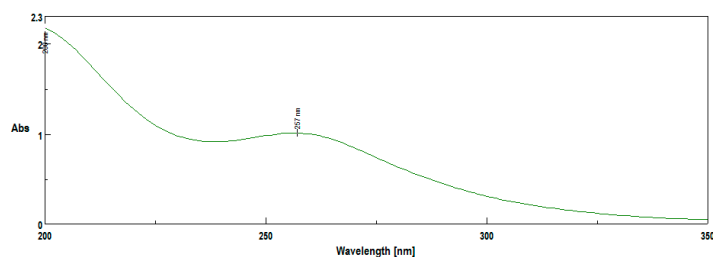

**Figure S49. UV electronic spectrum of POM 8,  $\text{K}_{10}[(\text{VO})_4(\text{PW}_9\text{O}_{34})_2] \cdot 26\text{H}_2\text{O}$**

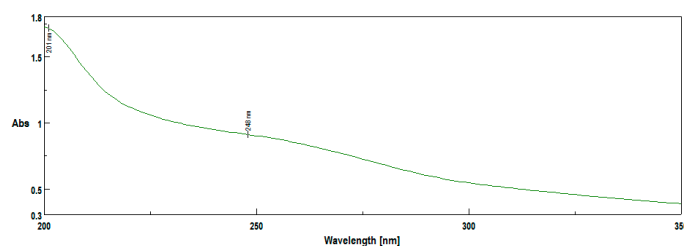

**Figure S50. UV electronic spectrum of POM 27,  $\text{Na}_{14}[\text{Mn}_3(\text{H}_2\text{O})_3(\text{SiW}_9\text{O}_{34})_2] \cdot 28\text{H}_2\text{O}$**

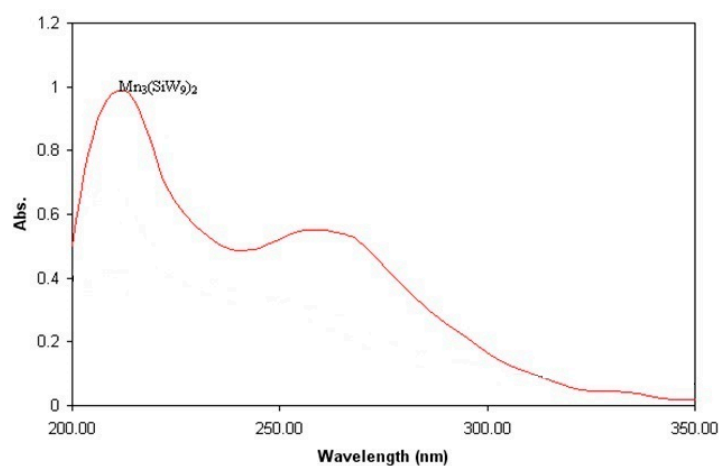

**UV electronic spectra of nanoPOMs with tri-lacunary *pseudo*-Keggin/sandwich type structures**

**UV electronic spectrum of POM 10,  $\text{K}_{11}\text{H}[(\text{VO})_3(\text{Sb}^{\text{III}}\text{W}_9\text{O}_{33})_2] \cdot 27\text{H}_2\text{O}$**

Published in our previous paper, cited in this paper as reference 22

**Figure S51. UV electronic spectrum of POM 25,  $\text{Na}_{10}[\text{Mn}_4(\text{H}_2\text{O})_2(\text{AsW}_9\text{O}_{34})_2] \cdot 27\text{H}_2\text{O}$**

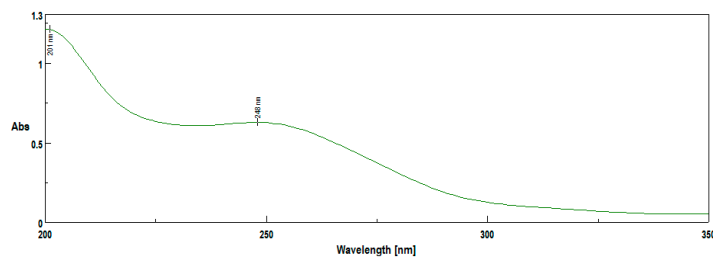

**Figure S52. UV electronic spectrum of POM 26,  $\text{Na}_{12}[\text{Co}_3(\text{H}_2\text{O})_3(\text{BiW}_9\text{O}_{33})_2] \cdot 37\text{H}_2\text{O}$**

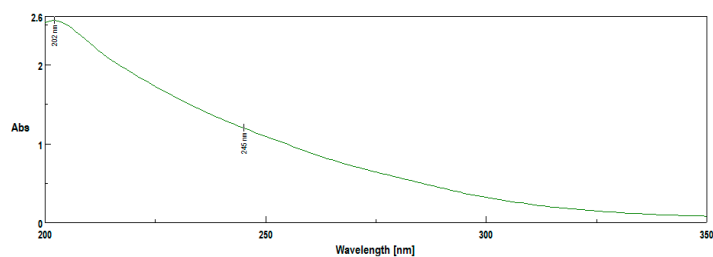

**Figure S53. UV electronic spectrum of POM 9,  $\text{K}_{10}[(\text{VO})_4(\text{AsW}_9\text{O}_{34})_2] \cdot 21\text{H}_2\text{O}$**

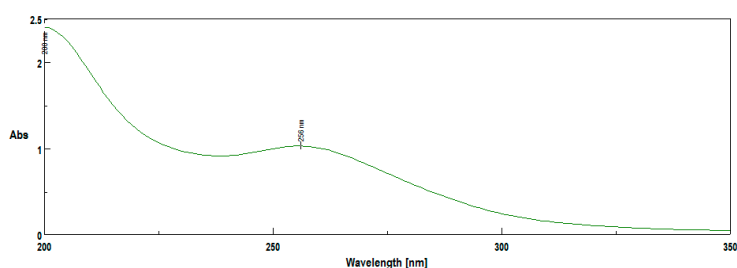

### UV electronic spectra of nanoPOMs with cluster structures

**Figure S54. UV electronic spectrum of POM 11,  $\text{Na}_{12}[\text{Sb}_2\text{W}_{22}\text{O}_{74}(\text{OH})_2] \cdot 38\text{H}_2\text{O}$**

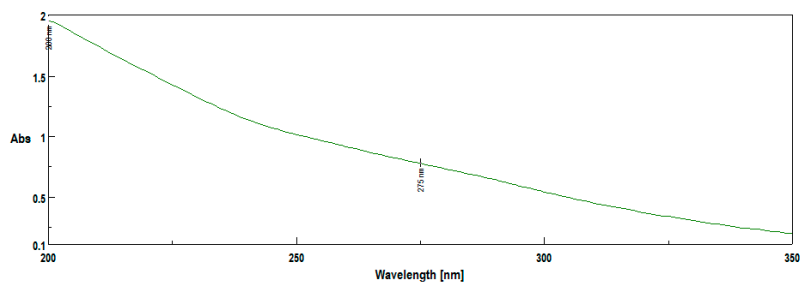

**Figure S55. UV electronic spectrum of POM 17,  $\text{Na}_{27}[\text{NaAs}_4\text{W}_{40}\text{O}_{140}] \cdot 42\text{H}_2\text{O}$**

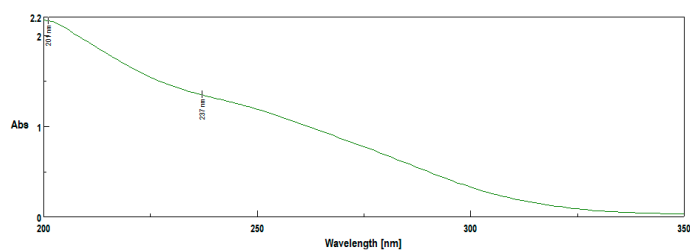

**Figure S56. UV electronic spectrum of POM 19,  $(\text{NBu}_4)_{27}[\text{NaAs}_4\text{Mo}_{40}\text{O}_{140}] \cdot 12\text{H}_2\text{O}$**

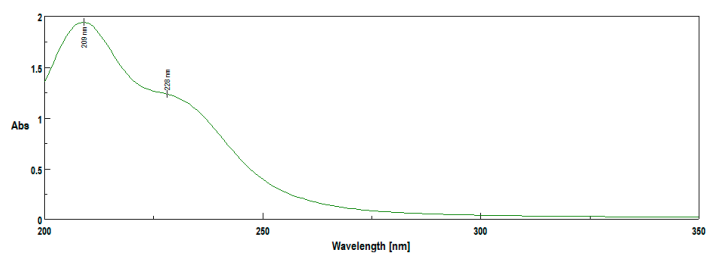

**Figure S57. UV electronic spectrum of POM 20,  $(\text{Bu}_3\text{Sn})_{18}[\text{NaSb}_9\text{W}_{21}\text{O}_{86}]$**

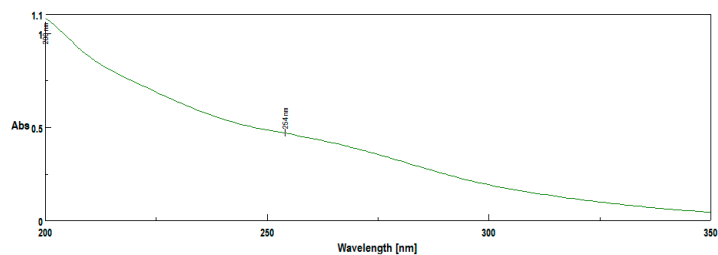

**UV electronic spectrum of POM 28,  $(\text{NH}_4)_4(\text{NBu}_4)_5[\text{Na}(\text{BuSn})_3\text{Sb}_9\text{W}_{21}\text{O}_{86}] \cdot 17\text{H}_2\text{O}$**

Published in our previous paper, cited in this paper as reference 22

**Figure S58. UV electronic spectrum of POM 29,  $\text{K}_{27}[\text{NaAs}_4\text{W}_{40}\text{O}_{140}] \cdot 52\text{H}_2\text{O}$**

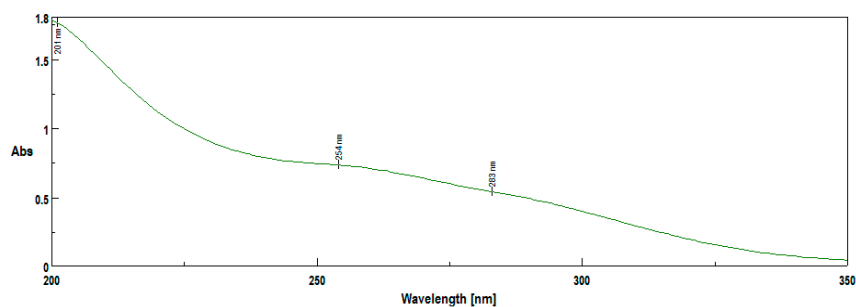

**UV electronic spectrum of nanoPOM mono-lacunary Wells-Dawson with mixed addenda atoms**

**Figure S59. UV electronic spectrum of POM 22,  $\text{K}_{10}[\text{Co}(\text{H}_2\text{O})\text{Si}_2\text{MoW}_{16}\text{O}_{61}] \cdot 18\text{H}_2\text{O}$**

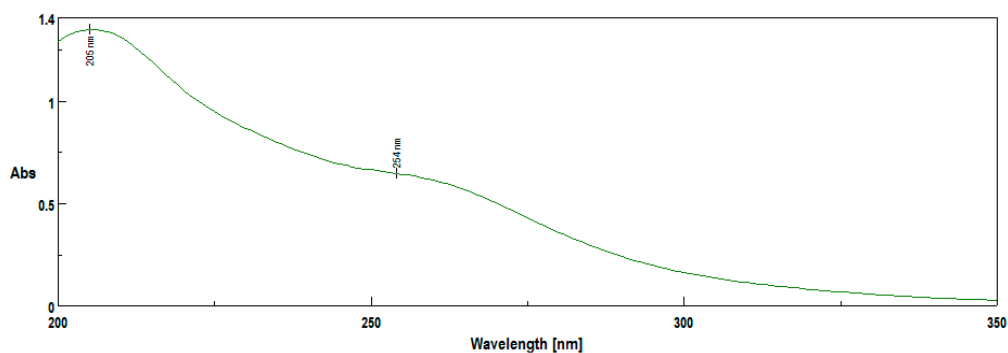



**Bacterial inoculi microplates prepared from various reference strains inhibited by the 21 analyzed nanoPOMs**

**Figure S60. Inhibition aspects for the 21 nanoPOMs analyzed (in microplates of bacterial inoculum prepared from reference strain ATCC 6538P – *Staphylococcus aureus*):**

**A-C. Active nanoPOMs, D. Control samples.**

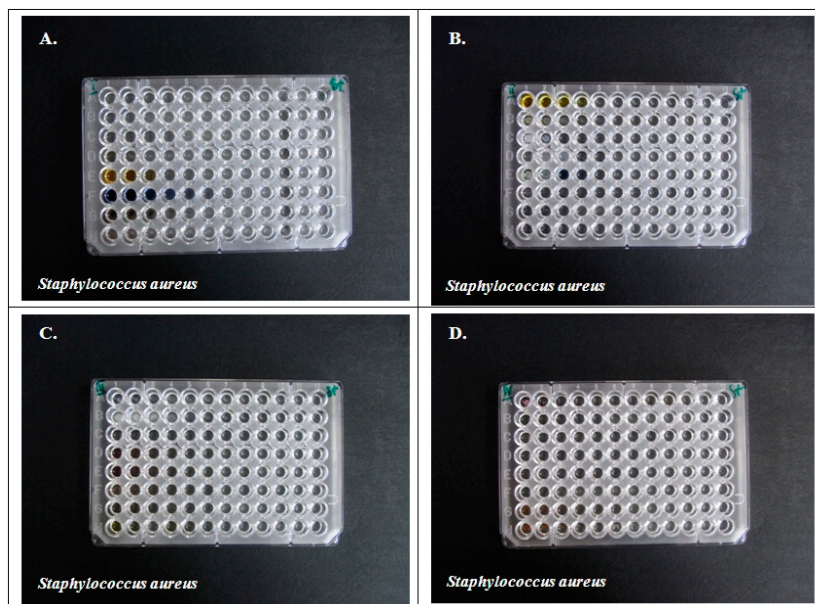

**Figure S61. Inhibition aspects for the 21 nanoPOMs analyzed (in microplates of bacterial inoculum prepared from reference strain ATCC 14579 – *Bacillus cereus*):**

**A-C. Active nanoPOMs, D. Control samples.**

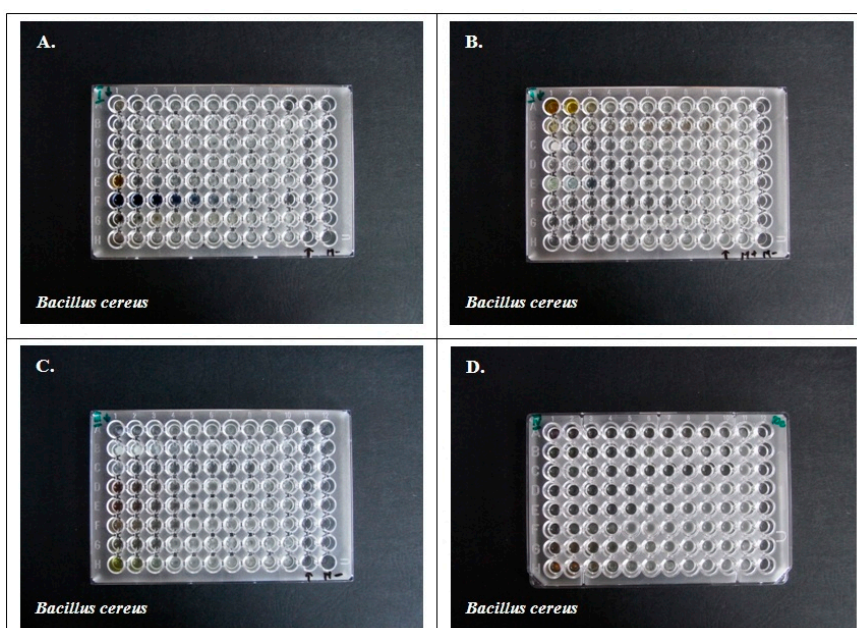

**Figure S62. Inhibition aspects for the 21 nanoPOMs analyzed (in microplates of bacterial inoculum prepared from reference strain ATCC 13076 – *Salmonella enteritidis*):**  
A-C. Active nanoPOMs, D. Control samples.

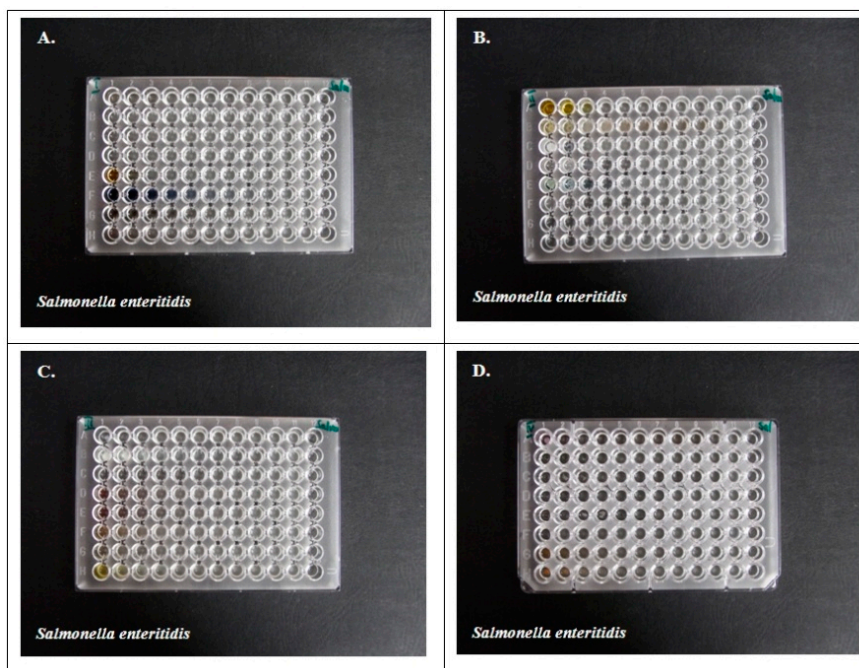

**Figure S63. Inhibition aspects for the 21 nanoPOMs analyzed (in microplates of bacterial inoculum prepared from reference strain ATCC 10536 – *Escherichia coli*):**  
A-C. Active nanoPOMs, D. Control samples.

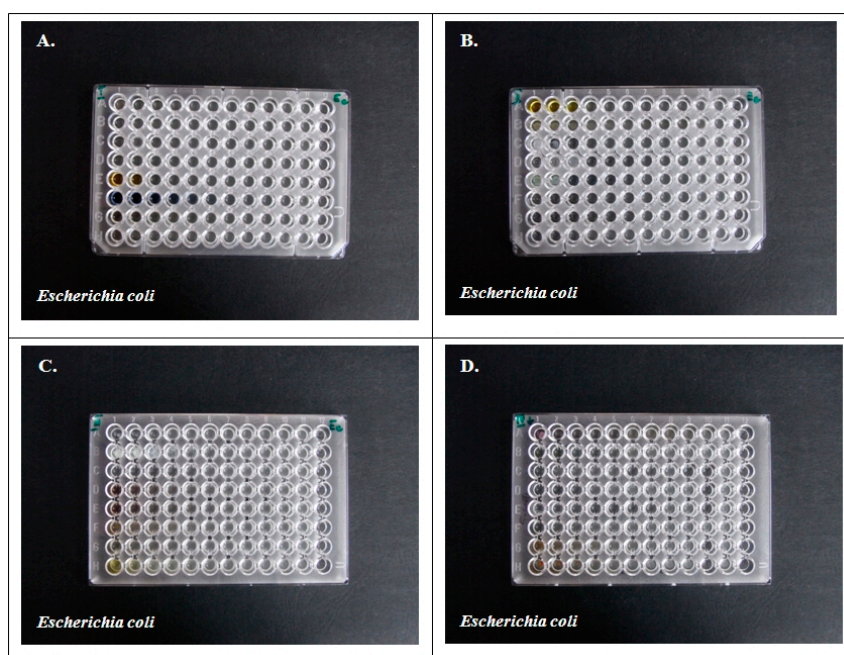



**Figure S64. Inhibition aspects for the 21 nanoPOMs analyzed (in microplates of bacterial inoculum prepared from reference strain ATCC 27853 – *Pseudomonas aeruginosa*):**  
**A-C. Active nanoPOMs, D. Control samples.**

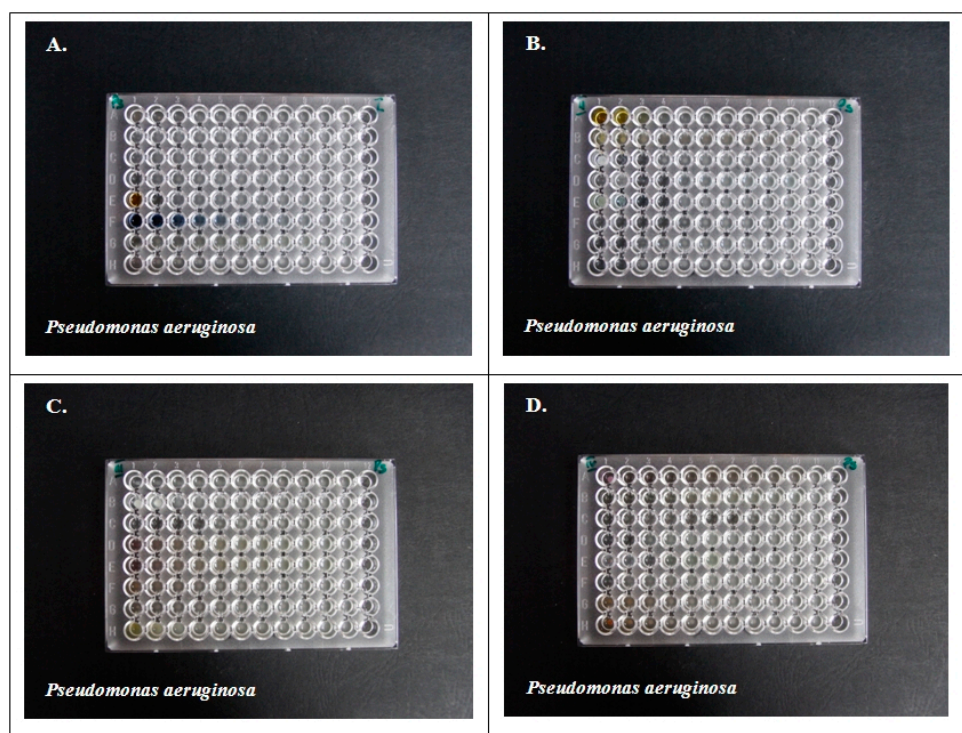

Supplement: s1 [file s1]
