# Supplementary material
Source: MDPI journal article supplement (https://www.mdpi.com/1424-8247/15/1/33)
Supplement: s1 [file s1]

## **SUPPLEMENTARY MATERIAL**

### ***In vitro* Antibacterial Susceptibility of Different Pathogens to Thirty Nano-Polyoxometalates**

**Ștefana Bâlici<sup>a</sup>, Dan Rusu<sup>b</sup>, Emőke Páll<sup>c</sup>, Miuța Filip<sup>d</sup>, Flore Chirilă<sup>e</sup>, Gheorghe Zsolt Nicula<sup>a</sup>, Mihaela Laura Vică<sup>a,\*</sup>, Rodica Ungur<sup>f</sup>, Horea-Vladi Matei<sup>a</sup>, Nicodim Iosif Fiț<sup>e</sup>**

<sup>a</sup> "Iuliu Hațieganu" University of Medicine and Pharmacy, Faculty of Medicine, Department of Cell and Molecular Biology, Cluj-Napoca, România

<sup>b</sup> "Iuliu Hațieganu" University of Medicine and Pharmacy, Faculty of Pharmacy, Department of Physical-Chemistry, Cluj-Napoca, România

<sup>c</sup> University of Agricultural Science and Veterinary Medicine, Faculty of Veterinary Medicine, Department of Reproduction, Obstetrics and Veterinary Gynecology, Cluj-Napoca, România

<sup>d</sup> "Babeș-Bolyai" University, "Raluca Ripan" Institute for Research in Chemistry, Analytical and Environmental Chemistry Laboratory, Cluj-Napoca, România

<sup>e</sup> University of Agricultural Science and Veterinary Medicine, Faculty of Veterinary Medicine, Department of Microbiology and Immunology, Cluj-Napoca, România

<sup>f</sup> "Iuliu Hațieganu" University of Medicine and Pharmacy, Faculty of Medicine, Department of Medical Rehabilitation, Cluj-Napoca, România

\* Correspondence: mvica@umfcluj.ro

#### **Supplemental Table of Contents**

|                                                                                                                                                                        |   |
|------------------------------------------------------------------------------------------------------------------------------------------------------------------------|---|
| The synthesis method and physico-chemical characterization of $K_6[(VO)SiMo_2W_9O_{39}] \cdot 11H_2O$ (POM 7) and its ligand $K_8[SiMo_2W_9O_{39}] \cdot 14H_2O$ (L 7) | 2 |
| <b>Figure S1</b> TG/DTG/DTA curves of $K_6[(VO)SiMo_2W_9O_{39}] \cdot 11H_2O$                                                                                          | 4 |
| <b>Figure S2</b> The proposed structure for POM 7:<br>$K_6[(VO)SiMo_2W_9O_{39}] \cdot 11H_2O$                                                                          | 4 |
| <b>Figure S3</b> FTIR spectra of POM 7, $K_6[(VO)SiMo_2W_9O_{39}] \cdot 11H_2O$ , and his ligand (L7), $K_8[SiMo_2W_9O_{39}] \cdot 14H_2O$                             | 5 |
| <b>Figure S4</b> UV (upper right window) and VIS electronic spectra of $K_6[(VO)SiMo_2W_9O_{39}] \cdot 11H_2O$                                                         | 6 |
| <b>Figure S5</b> ESR spectrum of $K_6[(VO)SiMo_2W_9O_{39}] \cdot 11H_2O$ complex powder at room temperature (solid line) and its simulated spectrum (dashed line)      | 8 |
| <b>Table S1.</b> FTIR spectral data (M = metal atoms)                                                                                                                  | 5 |
| <b>Table S2.</b> Spectral data from UV electronic spectrum of $K_6[(VO)SiMo_2W_9O_{39}] \cdot 11H_2O$                                                                  | 7 |

## 1. Synthesis and physico-chemical characterization of $K_6[(VO)SiMo_2W_9O_{39}] \cdot 11H_2O$

The mono-lacunary Keggin with mixed addenda atoms,  $K_6[(VO)SiMo_2W_9O_{39}] \cdot 11H_2O$  (POM7), with a new formula proposed here was first prepared (using the two step method) and characterized by us as described below. Both the POM 7 and its ligand  $K_8[SiMo_2W_9O_{39}] \cdot 14H_2O$  (L7) were identified by ultraviolet (UV), Fourier Transform Infrared (FTIR) and Electron Spin Resonance (ESR) spectroscopy. The analytical characterization of POM 7 by elemental analysis and thermal analysis data is described in Table 2 of this paper.

### 1.1. The synthesis of ligand L 7, $K_8[SiMo_2W_9O_{39}] \cdot 14H_2O$

The ligand  $K_8[SiMo_2W_9O_{39}] \cdot 14H_2O$  (L7) was prepared as follows: 20 mmol (4.84 g)  $Na_2MoO_4 \cdot 2H_2O$  was dissolved in 40 mL bidistilled and deionized hot water, then 90 mmol (29.69 g)  $Na_2WO_4 \cdot 2H_2O$  and very quickly 10 mmol (1.22 g)  $Na_2SiO_3$  were successively added under continuous stirring. This solution was acidified with 6M HCl to a pH of 4.5 and refluxed for three hours. Finally, fine powdered KCl was gradually added to this hot solution, under continuous stirring for 10 minutes. The precipitate was filtered under vacuum using a medium porosity frit, and the resulting white powder was dried in a stream of air. The compound was further dried in a desiccator, 8.2 mmol (25.12 g) of  $K_8[SiMo_2W_9O_{39}] \cdot 14H_2O$  being obtained at a yield of 82%. The equation of the chemical reaction to obtain the ligand for the mono-lacunary Keggin with mixed addenda atoms (Mo and W) was:

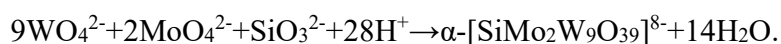

### 1.2. The synthesis of POM 7, $K_6[(VO)SiMo_2W_9O_{39}] \cdot 11H_2O$

2 mmol (6.13 g) of  $K_8[SiMo_2W_9O_{39}] \cdot 14H_2O$  was dissolved in a minimum volume (20 mL) of bidistilled and deionized hot water (heated to 70°C) under continuous stirring, and 2M  $H_2SO_4$  was added until a pH of 4. A solution obtained by dissolving 2 mmol (0.51 g)  $VOSO_4 \cdot 5H_2O$  in 20 mL of distilled water was then added drop by drop, and the mixture was stirred for 30 minutes. 10.06 mmol (0.75 g) of fine powdered KCl was gradually added under stirring.

This solution with the formed compound was cooled to room temperature, and stored to 4°C, brought to room temperature 24 hours later and dark blue POM7 crystals recovered after

three days. This POM was recrystallized from a minimum amount of warm bidistilled and deionized water, and then was dried in desiccator. Finally 1.48 mmol (4.52 g) were obtained with a final yield of 74%.

The reaction of vanadyl ions  $(VO)^{2+}$  with  $[SiMo_2W_9]^{8-}$  in aqueous medium, followed by the isolation of these complexes as potassium salts and their recrystallization from warm bidistilled and deionized water was carried out with good yields, according to the reaction:

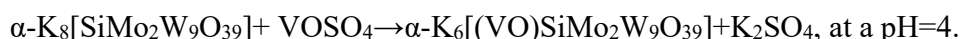

## 2. Physico-chemical characterization of $K_6[(VO)SiMo_2W_9O_{39}] \cdot 11H_2O$ (POM 7)

The thermal stability and behavior of POM 7 was investigated by thermogravimetric analysis of the vanadyl-tungsten-silicate complexes, performed after heating the samples at 180°C for 30 minutes. The presence of 11 crystallization/lattice water molecules was confirmed by a weight loss of 6.62% between 25-170°C, as seen on the thermogravimetry (TG) curve in Figure S1. The water loss occurred in two stages, as evidenced on the derivative thermogravimetry (DTG) curve in Figure S1. The dehydration process was accompanied by an endothermic event between ~25-170°C, which is observed on the differential thermal analysis (DTA) curve in the same figure.

According to literature data, the first exothermic peak of the DTA curve usually occurs at 20-30°C over the POMs' decomposition temperature [12,13] and is considered a sign of their thermal stability [22,30]. The first exothermic peak of POM7 was observed at 489°C, indicating a good thermal stability of the complex. The second exothermic peak, at 560°C, can be attributed to some phase transitions of the oxides resulting from the polyoxoanion decomposition.

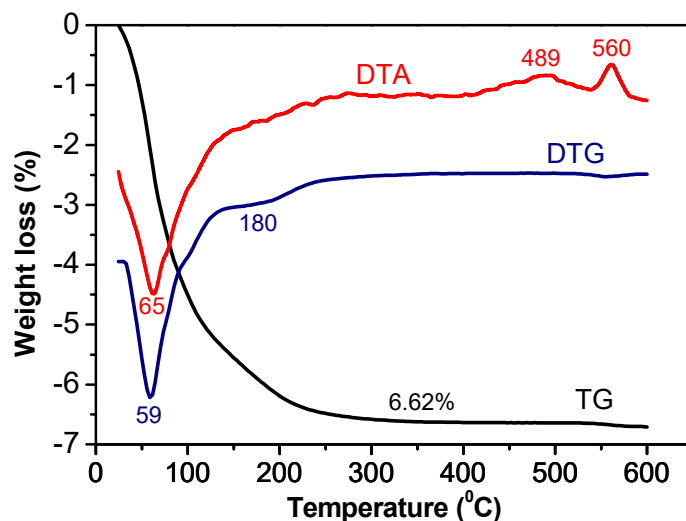

**Figure S1.** TG/DTG/DTA curves of  $K_6[(VO)SiMo_2W_9O_{39}] \cdot 11H_2O$ .

The proposed structure of POM 7, a mono-lacunary Keggin type, is illustrated in Figure S2.

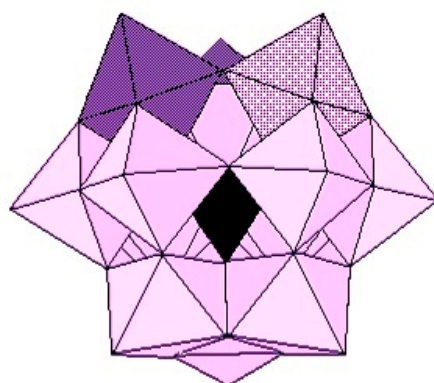

**Figure S2.** The proposed structure for POM 7:  $K_6[(VO)SiMo_2W_9O_{39}] \cdot 11H_2O$  (polyhedral representation:  $MoO_6$  octahedra – in dark purple,  $VO_6$  octahedron – in purple dotted,  $WO_6$  octahedra – in light purple, and  $SiO_4$  tetrahedron of the primary heteroatom – in black).

The study of the  $(VO)^{2+}$  ion coordination mode was performed by comparing the **FTIR vibrational spectra** of POM 7 ( $K_6[(VO)SiMo_2W_9O_{39}] \cdot 11H_2O$ ) with his ligand  $K_7[SiMo_2W_9O_{39}] \cdot 14H_2O$  (L7). The higher frequency value for the  $M=O_t$  double bond of POM 7

was compared to same bond in his ligand, demonstrating the involvement of terminal oxygen atoms ( $O_t$ ) in the vanadyl ion coordination.

The  $M-O_e-M$  tricentric bonds corresponding to  $MO_6$  octahedra, joined by common corners, are characterized by a single band. The  $M-O_e-M$  bond frequency in POM 7 is  $19\text{ cm}^{-1}$  higher than that of his ligand, difference due to the  $(VO)^{2+}$  ion coordination, as seen in Table S1 and Figure S3.

**Table S1.** FTIR spectral data ( $M$  = metal atoms).

| Attributed bond     | $K_8[SiMo_2W_9O_{39}] \cdot 14H_2O$ ; L 7 ( $cm^{-1}$ ) | $K_6[(VO)SiMo_2W_9O_{39}] \cdot 11H_2O$ ; POM 7 ( $cm^{-1}$ ) |
|---------------------|---------------------------------------------------------|---------------------------------------------------------------|
| $\nu_{as}(Si-O_i)$  | 1103 w                                                  | 1109 w                                                        |
| $\nu_{as}(M=O_t)$   | 947 s                                                   | 968 s                                                         |
| $\nu_{as}(M-O_e-M)$ | 887 vs, b                                               | 906 vs                                                        |
| $\nu_{as}(M-O_e-M)$ | 796 vs                                                  | 783 vs                                                        |
|                     | 729 s                                                   | 669 m                                                         |

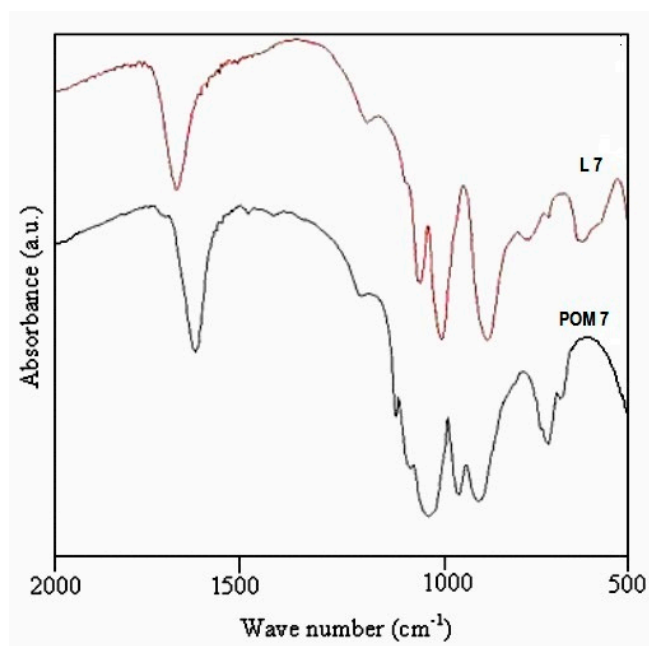

**Figure S3.** FTIR spectra of POM 7,  $K_6[(VO)SiMo_2W_9O_{39}] \cdot 11H_2O$ , and his ligand (L7),  $K_8[SiMo_2W_9O_{39}] \cdot 14H_2O$ ; spectral data for both L7 and POM7 were presented in Table 1 in the Supplementary Material, and their contribution and bonds assigned in Table 2 (the last column) of this paper.

The increased frequency of the POM 7  $M-O_e-M$  bonds expresses a shortening of the post-complexation binding compared to the L7 ligand. The  $M-O_e-M$  bond has a lower frequency in

POM 7 than in his ligand, which reflects an elongation of this bond in the nanocomplex compared to the vanadium-free ligand. The Si-O<sub>i</sub> bond also has a slightly modified frequency, insignificant in POM 7 relative to his ligand. The displacements of all bands in the nanocomplex compared to the ligand suggest the involvement of the oxygen atoms (O<sub>t</sub>, O<sub>c</sub> and O<sub>e</sub>) in the (VO)<sup>2+</sup> ion coordination.

**The UV electronic spectra** of the ligand and of the complex (here in Figure S4 and Table S2) presented two characteristic bands of the polyoxoanionic structures at  $\nu_2 = \sim 200$  nm attributed to the bonds M=O<sub>t</sub> ( $\nu_2$ ) (O<sub>t</sub>, the terminal oxygen atoms), and  $\nu_1 = \sim 250$  nm attributed to the bridge-bonds M-O<sub>b</sub>-M ( $\nu_1$ ), where the oxygen atoms (O<sub>b</sub>) into the bridge-bonds, with b = c are bridge-bonds via corners, and b = e bridge-bond via edges.

In the POM 7 spectrum, both the  $\nu_2$  (50251 cm<sup>-1</sup>/199 nm) band corresponding to the M=O<sub>t</sub> bond and the  $\nu_1$  (38759 cm<sup>-1</sup>/258 nm) band corresponding to the M-O<sub>b</sub>-M bond were shifted to higher frequencies than those presented by the ligand, which due to the vanadyl cations coordination by the O<sub>t</sub>, O<sub>c</sub> and O<sub>e</sub> oxygen atoms. All types of oxygen atoms in the POM 7 structure participated in the coordination, and these data were consistent with those obtained from FTIR vibrational spectra.

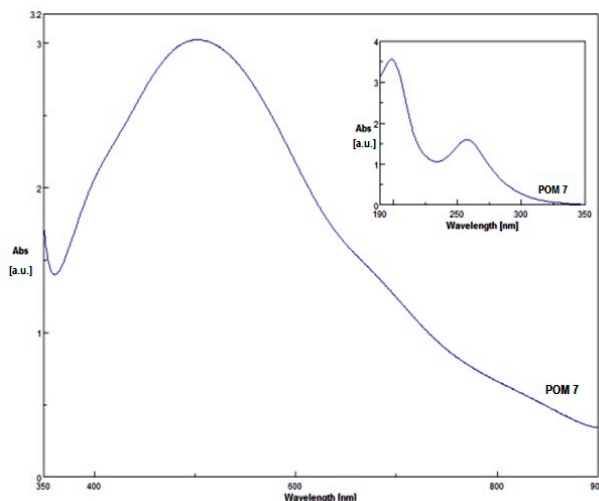

**Figure S4.** UV (upper right window) and VIS electronic spectra of K<sub>6</sub>[(VO)SiMo<sub>2</sub>W<sub>9</sub>O<sub>39</sub>] $\cdot$ 11H<sub>2</sub>O (recorded in aqueous solution at a concentration of 5 $\times$ 10<sup>-5</sup> mol/L for UV, and 5 $\times$ 10<sup>-3</sup> mol/L for VIS, respectively).

**Table S2.** Spectral data from UV electronic spectrum of  $K_6[(VO)SiMo_2W_9O_{39}] \cdot 11H_2O$ .

| Attributed bond      | $K_6[(VO)SiMo_2W_9O_{39}] \cdot 11H_2O$ ; POM 7 ( $cm^{-1}/nm$ ) |
|----------------------|------------------------------------------------------------------|
| $\nu_2(M=O_t)$       | $50251\text{ cm}^{-1}/199\text{ nm}$                             |
| $\nu_1(M-O_{c,e}-M)$ | $38759\text{ cm}^{-1}/258\text{ nm}$                             |

**In the Visible range, the electronic spectrum** of the nanocomplex presented a stronger absorption, over  $16000\text{ cm}^{-1}$ , and three transfer bands (as a shoulders) at lower wave number, but higher than the one given by the  $[VO(H_2O)_5]^{2+}$  aquaion.

The strong absorbances correspond to the  $V^{IV} \rightarrow W^{VI}$  load transfer transitions. The spectrum analysis leads to obtaining of the d-d transitions position for  $V^{IV}$  ions. The bands of the complex are assigned to the transitions:  ${}^2A_1(d_z^2) \leftarrow {}^2B_2(d_{xy})$ ,  ${}^2T_{2g} \leftarrow {}^2E_g$ ,  ${}^2A_{1g} \leftarrow {}^2B_{2g}$  and  ${}^2B_{1g} \leftarrow {}^2B_{2g}$ , according to the molecular orbital theory for vanadyl ions, with a local  $O_h$  symmetry, a theory developed in 1962 by Ballhausen and Gray.

The  $K_6[(VO)SiMo_2W_9O_{39}] \cdot 11H_2O$  electronic spectrum in Visible range exhibited four bands, and it can be concluded that this compound has a distorted  $O_h$  symmetry. The very weak shoulder-like band at  $13440\text{ cm}^{-1}/744\text{ nm}$  was shifted to lower energy compared to the  $[VO(H_2O)_5]^{2+}$  aquaion, and it was assigned to the transition  ${}^2B_{1g} \leftarrow {}^2B_{2g}$ .

The  $15527\text{ cm}^{-1}/644\text{ nm}$  shoulder-like band shifted to higher energy compared to the  $[VO(H_2O)_5]^{2+}$  aquaion, and was assigned to the  ${}^2A_{1g} \leftarrow {}^2B_{2g}$  transition.

The third band at  $19880\text{ cm}^{-1}/503\text{ nm}$  was very strong in intensity, being shifted to higher energy compared to the aquaion  $[VO(H_2O)_5]^{2+}$ , and can be attributed to the  ${}^2T_{2g} \leftarrow {}^2E_g$  transition. Finally, the fourth band at  $24752\text{ cm}^{-1}/404\text{ nm}$  shifted to lower energy compared to the  $[VO(H_2O)_5]^{2+}$  aquaion and can be attributed to  ${}^2A_1(d_z^2) \leftarrow {}^2B_2(d_{xy})$  transition.

### Electron Spin Resonance (ESR) Spectra

The ESR spectrum of  $K_6[(VO)SiMo_2W_9O_{39}] \cdot 11H_2O$  (Figure S5), in powder form, recorded at room temperature, highlights the presence of reduced vanadium species, as also shown by the electronic spectra. The spectrum recorded for the Keggin complex with mixed addenda atoms of Mo, W is axial and suggests the existence of eight hyperfine components, both in the perpendicular bands  $\perp$  and in the parallel ones, due to the hyperfine coupling of the unpaired electron with nuclear spin,  $I = 7/2$ , of the  ${}^{51}V$  isotope with natural abundance of 99.8%.

The absence of signals for  $\text{Mo}^{5+}$  and  $\text{W}^{5+}$  ions in the ESR spectrum confirms that all Mo and W ions are in a +6 oxidation state.

ESR spectral parameters for  $\text{K}_6[(\text{VO})\text{SiMo}_2\text{W}_9\text{O}_{39}] \cdot 11\text{H}_2\text{O}$  have the following values:

$$g_{\parallel}=1.922, \quad g_{\perp}=1.972, \quad A_{\parallel}=181\text{G}, \quad A_{\perp}=63\text{G}$$

$$\Delta B_{\parallel}(p-p)=30\text{G} \quad \Delta B_{\perp}(p-p)=33\text{G}.$$

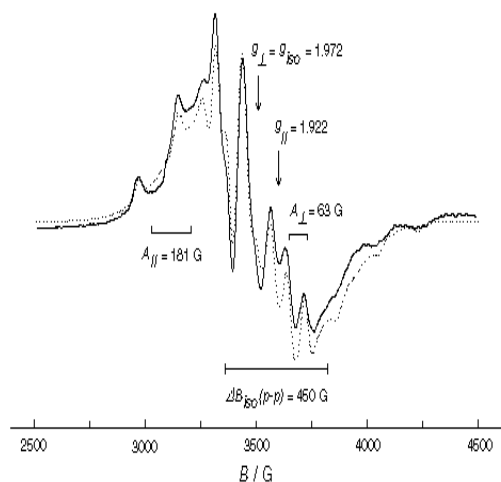

**Figure S5.** ESR spectrum of  $\text{K}_6[(\text{VO})\text{SiMo}_2\text{W}_9\text{O}_{39}] \cdot 11\text{H}_2\text{O}$  complex powder at room temperature (solid line) and its simulated spectrum (dashed line).

The two components (parallel and perpendicular) contribute equally (50%) to the formation of the spectra, suggesting that species reduced by one electron and the species monoprotonated by 2 electrons are present in equal amounts in the sample. The main tensors of the axes  $g$  and  $A$  were supposed to coincide with  $g_{\parallel}$  and  $A_{\parallel}$  of the  $\text{V}=\text{O}_t$  bond. Differences between experimental and spectrally simulated data indicate a small rhombic distortion of the vanadium octahedron ( $\text{VO}_6$ ).
